# Supplementary material
Source: publisher figshare collection journal article supplement (https://acs.figshare.com/ndownloader/files/24541076)
Supplement: Supplementary file 1 [file 24541076]

## **Furostanol Saponins from *Trillium tschonoskii* Promote the Expansion of Human Cord Blood Hematopoietic Stem and Progenitor Cells**

Bei Wang,<sup>#,†,‡</sup> Jing Zhang,<sup>#,†,⊥</sup> Xu Pang,<sup>†</sup> Junyong Yuan,<sup>⊥</sup> Jie Yang,<sup>†</sup> Yinjun Yang,<sup>†</sup> Lin Gao,<sup>†</sup> Jie Zhang,<sup>†</sup> Zeng Fan,<sup>§,⊥</sup> Lijuan He,<sup>§,⊥</sup> Wen Yue,<sup>§,⊥</sup> Yanhua Li,<sup>\*,†,⊥</sup> Xuetao Pei,<sup>\*,§,⊥</sup> Baiping Ma<sup>\*,†,‡</sup>

<sup>†</sup>Beijing Institute of Radiation Medicine, Beijing 100850, People's Republic of China

<sup>‡</sup>Guangdong Pharmaceutical University, Guangzhou 510006, People's Republic of China

<sup>§</sup>Institute of Health Service and Transfusion Medicine, Beijing 100850, People's Republic of China

<sup>⊥</sup>South China Research Center for Stem Cell & Regenerative Medicine, SCIB, Guangzhou 510005, People's Republic of China

\*Corresponding Author *Email*: mabaiping@sina.com (B.-P. Ma); peixt@bmi.ac.cn (X.-T. Pei); shirlylyh@126.com (Y.-H. Li).

<sup>#</sup>These authors contributed equally to this work

### The details of extraction and isolation.

5.0 kg of *T. tschonoskii* rhizomes were crushed and extracted with 50% aq. EtOH at reflux. (Three times, each for 2 hrs.). The filtered solution was concentrated and centrifuged to get the supernatants and sediments. The supernatants were subjected to a SP825 macroporous resin column, eluted with EtOH-H<sub>2</sub>O (5:95→30:70→50:50→75:25→95:5) to yield five fractions (Fr.A~Fr.E). Fr.C (120.0 g) was subjected to silica-gel CC with CHCl<sub>3</sub>-MeOH-H<sub>2</sub>O (5:1:0.1→2:1:0.1) as the eluent, and five fractions (Fr.C1~Fr.C5) were obtained. Fr.C3 (35.0 g) was further subjected to MCI CC with (CH<sub>3</sub>)<sub>2</sub>CO-H<sub>2</sub>O (10:90→50:50) as the eluent. As a result, a total of thirty fractions were collected (Fr.C3/1~Fr.C3/30). Fr.C3/6 was separated by preparative HPLC (pHPLC) with CH<sub>3</sub>CN-H<sub>2</sub>O (20:80) to give seven subfractions (Fr.C3/6-1~Fr.C3/6-7). Fr.C3/7~9 was separated by preparative HPLC (pHPLC) with CH<sub>3</sub>CN-H<sub>2</sub>O (20:80) to yield three fractions (Fr.C3/7~9/1~Fr.C3/7~9/3). Fr.C3/10~11 was separated by pHPLC with CH<sub>3</sub>CN-H<sub>2</sub>O (22:78) to yield five fractions (Fr.C3/10~11/1~Fr.C3/10~11/5). Fr.C3/12 was separated by pHPLC with CH<sub>3</sub>CN-H<sub>2</sub>O (22:78) to give five subfractions (Fr.C3/12/1~Fr.C3/12/5). Fr.C3/13~14 was separated by pHPLC with CH<sub>3</sub>CN-H<sub>2</sub>O (22:78) to yield five fractions (Fr.C3/13~14/1~Fr.C3/13~14/5). Fr.C3/6/3, Fr.C3/7~9/3, Fr.C3/10~11/3, Fr.C3/12/3 and Fr.C3/13~14/3 were separated by pHPLC with (CH<sub>3</sub>)<sub>2</sub>CO-H<sub>2</sub>O (22:78) to give **11** (47.0 mg). Fr.C3/6~4/6, Fr.C3/10~11/4, Fr.C3/12/2, and Fr.C3/13~14/2 were separated by pHPLC with (CH<sub>3</sub>)<sub>2</sub>CO-H<sub>2</sub>O (22:78) to give **16** (303.0 mg) and **17** (327.0 mg). Fr.C3/12/4 and Fr.C3/13~14/4 were separated by pHPLC with (CH<sub>3</sub>)<sub>2</sub>CO-H<sub>2</sub>O (24:76) to give **12** (57.0 mg). Fr.C3/10~11/5, Fr.C3/12/5 and Fr.C3/13~14/5 were separated by pHPLC with (CH<sub>3</sub>)<sub>2</sub>CO-H<sub>2</sub>O (24:76) to give **10** (42.0 mg). Fr.C4 (35.0 g) was subjected to a MCI gel column eluted with (CH<sub>3</sub>)<sub>2</sub>CO-H<sub>2</sub>O (10:90→15:85→20:80→30:70→50:50) to afford nine fractions (Fr.C4/1~Fr.C4/9). Fr.C4/1 was separated by pHPLC with CH<sub>3</sub>CN-H<sub>2</sub>O (20:80) to give six fractions (Fr.C4/1/1~Fr.C4/1/6). Fr.C4/2 was separated by pHPLC with CH<sub>3</sub>CN-H<sub>2</sub>O (v/v, 20:80) to give six fractions (Fr.C4/2/1~Fr.C4/2/6). Fr.C4/3 was

separated by pHPLC with CH<sub>3</sub>CN-H<sub>2</sub>O (21:79) to give three fractions (Fr.C4/3/1~Fr.C4/3/1), Fr.C4/4 was separated by pHPLC with CH<sub>3</sub>CN-H<sub>2</sub>O (22:78) to give four fractions (Fr.C4/4/1~Fr.C4/4/4). Fr.C4/5 was separated by pHPLC with CH<sub>3</sub>CN-H<sub>2</sub>O (v/v, 22:78) to give five fractions (Fr.C4/5/1~Fr.C4/5/5). Fr.C4/6 was separated by pHPLC with CH<sub>3</sub>CN-H<sub>2</sub>O (23:77) to give five fractions (Fr.C4/6/1~Fr.C4/6/5). Fr.C4/1/6, Fr.C4/2/6 and Fr.C4/3/2 were separated by pHPLC with (CH<sub>3</sub>)<sub>2</sub>CO-H<sub>2</sub>O (25:75) to give **2** (10.0 mg). Fr.C4/3/3, Fr.C4/4/4, Fr.C4/5/4 and Fr.C4/6/5 were separated by preparative HPLC with (CH<sub>3</sub>)<sub>2</sub>CO-H<sub>2</sub>O (26:74) to give **18** (25.0 mg). Fr.C5 (35.0 g) was subjected to C<sub>18</sub> column with (CH<sub>3</sub>)<sub>2</sub>CO-H<sub>2</sub>O (24:76) to afford six fractions (Fr.C5/1~Fr.C5/6). Fr.C5/1 was separated by pHPLC with CH<sub>3</sub>CN-H<sub>2</sub>O (16:84) to give five fractions (Fr.C5/1/1~Fr.C5/1/5). Fr.C5/2 was separated by pHPLC with (CH<sub>3</sub>)<sub>2</sub>CO-H<sub>2</sub>O (22:78) to give four fractions (Fr.C5/2/1~Fr.C5/2/4). Fr.C5/3 was separated by pHPLC with (CH<sub>3</sub>)<sub>2</sub>CO-H<sub>2</sub>O (22:78) to give five fractions (Fr.C5/3/1~Fr.C5/3/5). Fr.C5/4 was separated by pHPLC with (CH<sub>3</sub>)<sub>2</sub>CO-H<sub>2</sub>O (22:78) to give five fractions (Fr.C5/4/1~Fr.C5/4/5). Fr.C5/5 was separated by pHPLC with CH<sub>3</sub>CN-H<sub>2</sub>O (20:80) to give six fractions (Fr.C5/5/1~Fr.C5/5/6). Fr.C5/6 was separated by pHPLC with CH<sub>3</sub>CN-H<sub>2</sub>O (22:78) to give seven fractions (Fr.C5/6/1~Fr.C5/6/7). Fr.C5/2/3, Fr.C5/3/3, Fr.C5/4/2 and Fr.C5/4/3 were separated by pHPLC with CH<sub>3</sub>CN-H<sub>2</sub>O (18:82) to give **1** (9.2 mg), **4** (14.6 mg) and **13** (141.0 mg). Fr.C5/2/4, Fr.C5/3/5 and Fr.C5/4/5 were separated by pHPLC with CH<sub>3</sub>CN-H<sub>2</sub>O (20:80) to give **7** (11.9 mg), **8** (4.8 mg), **9** (11.9 mg), **19** (12.0 mg). Fr.C5/5/2, Fr.C5/5/3 and Fr.C5/6/2 were separated by preparative HPLC with (CH<sub>3</sub>)<sub>2</sub>CO-H<sub>2</sub>O (24:76) to give **3** (6.0 mg). The sediments (133.0 g) and Fr.D (95.0 g) were subjected to ODS column with CH<sub>3</sub>CN-H<sub>2</sub>O (45:55) to afford a mix fraction (Fr.F). Fr.F was subjected to ODS column with (CH<sub>3</sub>)<sub>2</sub>CO-H<sub>2</sub>O (v/v, 40:60) to afford a five fractions (Fr.F/1~Fr.F/5). Fr.F/2 was separated by preparative HPLC with CH<sub>3</sub>CN-H<sub>2</sub>O (22:78) to give five fractions (Fr.F/2/1~Fr.F/2/5). Fr.F/3 was separated by pHPLC with CH<sub>3</sub>CN-H<sub>2</sub>O (24:76) to give six fractions (Fr.F/3/1~Fr.F/3/6). Fr.F/4 was separated by pHPLC with CH<sub>3</sub>CN-H<sub>2</sub>O (26:74) to give six fractions (Fr.F/4/1~Fr.F/4/6). Fr.F/2/2, Fr.F/2/3 and Fr.F/3/1 were separated by preparative

HPLC with (CH<sub>3</sub>)<sub>2</sub>CO-H<sub>2</sub>O (25:75) to give **14** (40.0 mg) and **20** (34.0 mg). Fr.F/2/5, Fr.F/3/2, Fr.F/3/4 and Fr.F/4/1 were separated by pHPLC with (CH<sub>3</sub>)<sub>2</sub>CO-H<sub>2</sub>O (29:71) to give **5** (122.0 mg), **6** (141.0 mg), **15** (14.5 mg).

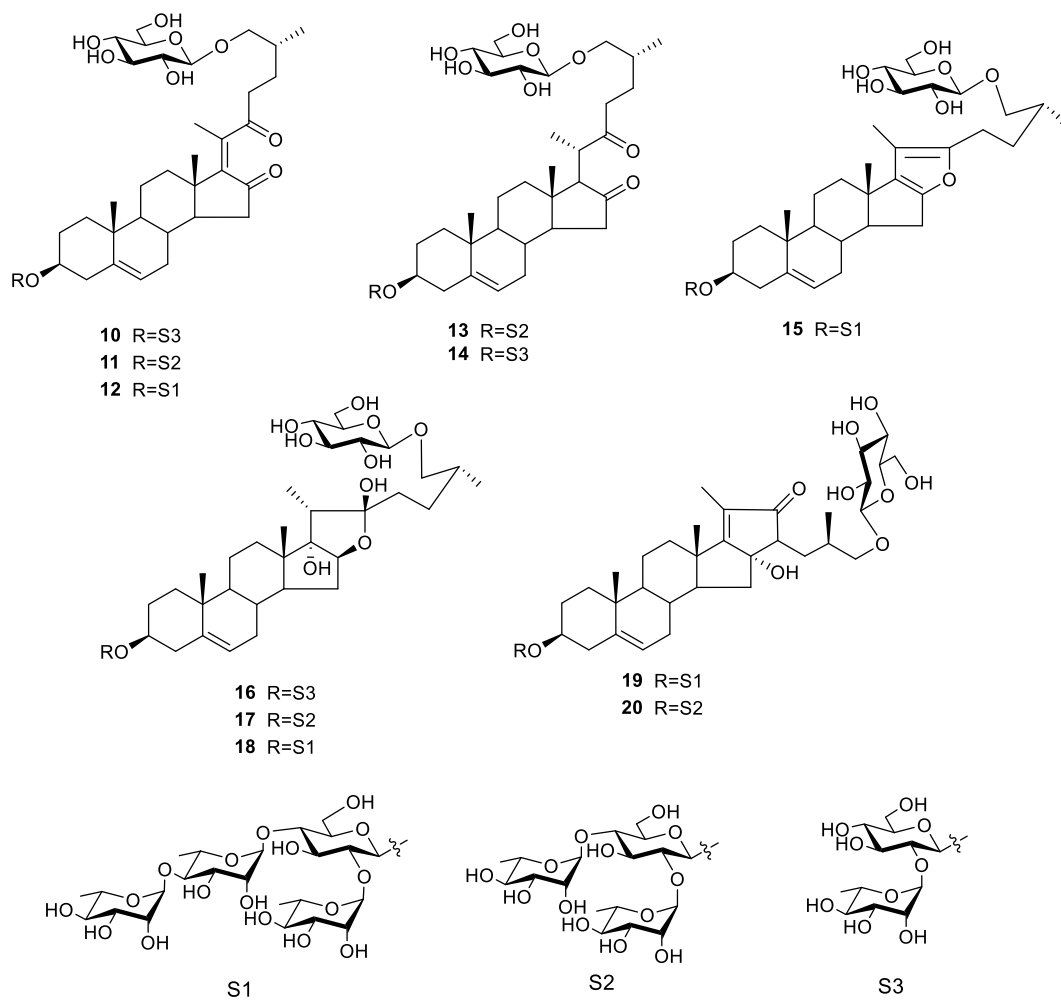

Structures of the known compounds **10-20**.

<sup>13</sup>C NMR data of known compounds **10-20** (recorded in pyridine-d<sub>5</sub>;  $\delta$  in ppm).

| Position      | 10    | 11    | 12    | 13    | 14    | 15    | 16    | 17    | 18    | 19    | 20    |
|---------------|-------|-------|-------|-------|-------|-------|-------|-------|-------|-------|-------|
| 1             | 37.2  | 37.2  | 37.2  | 37.2  | 37.2  | 37.4  | 37.6  | 37.6  | 37.6  | 37.6  | 37.6  |
| 2             | 30.2  | 30.1  | 30.1  | 30.1  | 30.2  | 30.2  | 30.2  | 30.2  | 30.2  | 30.2  | 30.2  |
| 3             | 78.7  | 78.5  | 78.7  | 78.1  | 77.8  | 78.0  | 78.3  | 78.3  | 78.7  | 78.0  | 78.1  |
| 4             | 38.8  | 38.9  | 38.7  | 38.9  | 38.9  | 39.0  | 39.0  | 39.0  | 39.0  | 39.0  | 39.0  |
| 5             | 141.0 | 140.9 | 140.9 | 141.0 | 141.0 | 141.2 | 140.9 | 140.9 | 140.8 | 140.9 | 140.9 |
| 6             | 121.3 | 121.4 | 121.4 | 121.5 | 121.4 | 121.6 | 121.8 | 121.6 | 121.9 | 121.6 | 121.6 |
| 7             | 31.7  | 31.7  | 31.7  | 32.0  | 32.0  | 32.0  | 32.5  | 32.5  | 32.5  | 31.9  | 31.8  |
| 8             | 30.8  | 30.8  | 30.8  | 31.0  | 31.0  | 30.5  | 32.3  | 32.3  | 32.3  | 32.0  | 31.9  |
| 9             | 49.9  | 49.9  | 49.9  | 50.1  | 50.1  | 51.1  | 50.3  | 50.3  | 50.3  | 50.5  | 50.5  |
| 10            | 37.1  | 37.1  | 37.1  | 37.1  | 37.1  | 37.3  | 37.2  | 37.2  | 37.2  | 37.2  | 37.6  |
| 11            | 20.9  | 20.9  | 20.9  | 20.8  | 20.8  | 20.7  | 21.0  | 21.0  | 21.0  | 20.6  | 20.6  |
| 12            | 39.0  | 38.8  | 38.9  | 39.0  | 39.0  | 35.7  | 32.0  | 32.0  | 32.0  | 35.7  | 35.7  |
| 13            | 43.4  | 43.4  | 43.4  | 44.0  | 42.4  | 41.2  | 45.1  | 45.1  | 45.1  | 44.0  | 44.0  |
| 14            | 50.5  | 50.5  | 50.5  | 50.3  | 50.3  | 60.8  | 53.1  | 53.1  | 53.1  | 53.8  | 53.8  |
| 15            | 36.1  | 36.1  | 36.1  | 39.1  | 39.1  | 26.9  | 32.2  | 32.2  | 32.2  | 38.4  | 38.4  |
| 16            | 210.4 | 210.4 | 210.4 | 216.8 | 216.9 | 155.3 | 90.8  | 90.8  | 90.8  | 82.9  | 82.9  |
| 17            | 142.6 | 142.6 | 142.6 | 63.9  | 63.9  | 137.2 | 90.5  | 90.5  | 90.5  | 182.0 | 182.1 |
| 18            | 15.8  | 15.8  | 15.8  | 14.1  | 14.1  | 18.2  | 17.3  | 17.3  | 17.3  | 15.7  | 15.7  |
| 19            | 19.4  | 19.3  | 19.3  | 19.4  | 19.4  | 19.3  | 19.5  | 19.5  | 19.5  | 19.4  | 19.4  |
| 20            | 145.6 | 145.6 | 145.6 | 42.4  | 44.0  | 111.9 | 43.6  | 43.6  | 43.6  | 128.2 | 128.2 |
| 21            | 16.8  | 16.8  | 16.8  | 16.2  | 16.2  | 9.0   | 10.5  | 10.5  | 10.5  | 8.5   | 8.6   |
| 22            | 205.7 | 205.6 | 205.6 | 212.5 | 212.5 | 153.7 | 111.4 | 111.4 | 111.4 | 212.2 | 212.2 |
| 23            | 38.0  | 38.0  | 38.0  | 38.3  | 38.3  | 33.2  | 36.9  | 36.9  | 36.9  | 57.5  | 57.5  |
| 24            | 28.0  | 28.0  | 28.0  | 28.1  | 28.1  | 24.4  | 28.1  | 28.1  | 28.1  | 29.3  | 29.3  |
| 25            | 33.4  | 33.4  | 33.4  | 33.5  | 33.5  | 33.5  | 34.3  | 34.3  | 34.3  | 31.8  | 32.0  |
| 26            | 75.1  | 75.1  | 75.1  | 75.0  | 75.0  | 74.9  | 75.2  | 75.2  | 75.3  | 76.6  | 76.6  |
| 27            | 17.5  | 17.5  | 17.5  | 17.4  | 17.4  | 17.2  | 17.5  | 17.5  | 17.5  | 17.2  | 17.2  |
| 3'-O-Glc-1'   | 100.4 | 100.3 | 100.4 | 100.4 | 100.4 | 100.4 | 100.4 | 100.3 | 100.4 | 100.4 | 100.4 |
| 2'            | 79.7  | 78.0  | 80.4  | 78.0  | 79.7  | 77.8  | 79.7  | 78.6  | 80.4  | 77.8  | 78.0  |
| 3'            | 77.9  | 78.7  | 77.1  | 78.7  | 77.9  | 77.0  | 77.9  | 78.0  | 77.0  | 77.1  | 78.6  |
| 4'            | 71.9  | 77.8  | 78.0  | 77.8  | 71.9  | 78.1  | 71.7  | 78.1  | 78.1  | 77.8  | 77.8  |
| 5'            | 78.3  | 77.0  | 78.0  | 77.0  | 78.3  | 77.8  | 77.8  | 76.9  | 77.9  | 77.9  | 77.0  |
| 6'            | 62.7  | 61.4  | 61.3  | 61.3  | 62.7  | 61.3  | 62.9  | 61.3  | 61.2  | 61.3  | 61.3  |
| 2'-O-Rha-1''  | 102.1 | 102.0 | 102.2 | 102.0 | 102.1 | 102.3 | 102.1 | 102.0 | 102.2 | 102.2 | 102.1 |
| 2''           | 72.9  | 72.6  | 72.9  | 72.9  | 72.9  | 72.9  | 72.9  | 72.5  | 72.9  | 72.9  | 72.6  |
| 3''           | 72.6  | 72.8  | 72.7  | 72.8  | 72.6  | 72.7  | 72.6  | 72.8  | 72.7  | 72.7  | 72.8  |
| 4''           | 74.2  | 73.9  | 74.0  | 73.9  | 74.2  | 74.0  | 74.2  | 74.2  | 74.1  | 74.0  | 74.0  |
| 5''           | 69.5  | 70.4  | 70.4  | 70.4  | 69.5  | 70.4  | 69.5  | 69.5  | 70.4  | 70.4  | 69.6  |
| 6''           | 18.7  | 18.5  | 18.9  | 18.7  | 18.7  | 18.9  | 18.7  | 18.7  | 18.9  | 18.9  | 18.5  |
| 4'-O-Rha-1''' |       | 102.9 | 103.3 | 102.9 |       | 103.3 |       | 102.9 | 103.3 | 103.3 | 103.0 |
| 2'''          |       | 72.5  | 73.3  | 72.5  |       | 73.3  |       | 72.6  | 73.3  | 73.3  | 72.6  |

|                 |       |       |       |       |       |       |       |       |       |       |       |
|-----------------|-------|-------|-------|-------|-------|-------|-------|-------|-------|-------|-------|
| 3'''            |       | 72.9  | 72.9  | 72.6  |       | 72.9  |       | 72.8  | 72.9  | 72.9  | 72.9  |
| 4'''            |       | 74.2  | 77.8  | 74.2  |       | 80.4  |       | 73.9  | 77.8  | 80.4  | 74.2  |
| 5'''            |       | 69.5  | 68.4  | 69.5  |       | 68.4  |       | 70.4  | 68.4  | 68.4  | 70.5  |
| 6'''            |       | 18.7  | 18.7  | 18.5  |       | 18.7  |       | 18.5  | 18.7  | 18.7  | 18.7  |
|                 |       |       |       |       |       |       |       |       |       |       |       |
| 4'''-O-Rha-1''' |       |       | 102.3 |       |       | 102.3 |       |       | 102.3 | 102.3 |       |
| 2'''            |       |       | 72.9  |       |       | 72.9  |       |       | 72.9  | 72.9  |       |
| 3'''            |       |       | 72.5  |       |       | 72.5  |       |       | 72.5  | 72.5  |       |
| 4'''            |       |       | 74.2  |       |       | 74.2  |       |       | 74.2  | 74.2  |       |
| 5'''            |       |       | 69.5  |       |       | 69.6  |       |       | 69.6  | 69.6  |       |
| 6'''            |       |       | 18.5  |       |       | 18.5  |       |       | 18.5  | 18.5  |       |
| 26-O-Glc-1'''   | 104.9 | 104.9 | 104.9 | 104.9 | 104.9 | 104.9 | 105.0 | 105.1 | 105.0 | 105.3 | 105.3 |
| 2'''            | 75.3  | 75.2  | 75.2  | 75.2  | 75.2  | 75.2  | 75.2  | 75.2  | 75.2  | 75.3  | 75.3  |
| 3'''            | 78.5  | 78.7  | 78.5  | 78.6  | 78.6  | 78.7  | 78.5  | 78.7  | 78.6  | 78.5  | 78.5  |
| 4'''            | 71.8  | 71.7  | 71.7  | 71.8  | 71.8  | 71.8  | 71.8  | 71.7  | 71.8  | 71.7  | 71.7  |
| 5'''            | 78.5  | 78.0  | 78.7  | 78.7  | 78.7  | 78.5  | 78.6  | 78.5  | 78.5  | 78.6  | 78.6  |
| 6'''            | 62.9  | 62.9  | 62.9  | 62.9  | 62.9  | 62.9  | 62.7  | 62.9  | 62.9  | 62.8  | 62.8  |

---

## NMR spectra of compounds 1-20

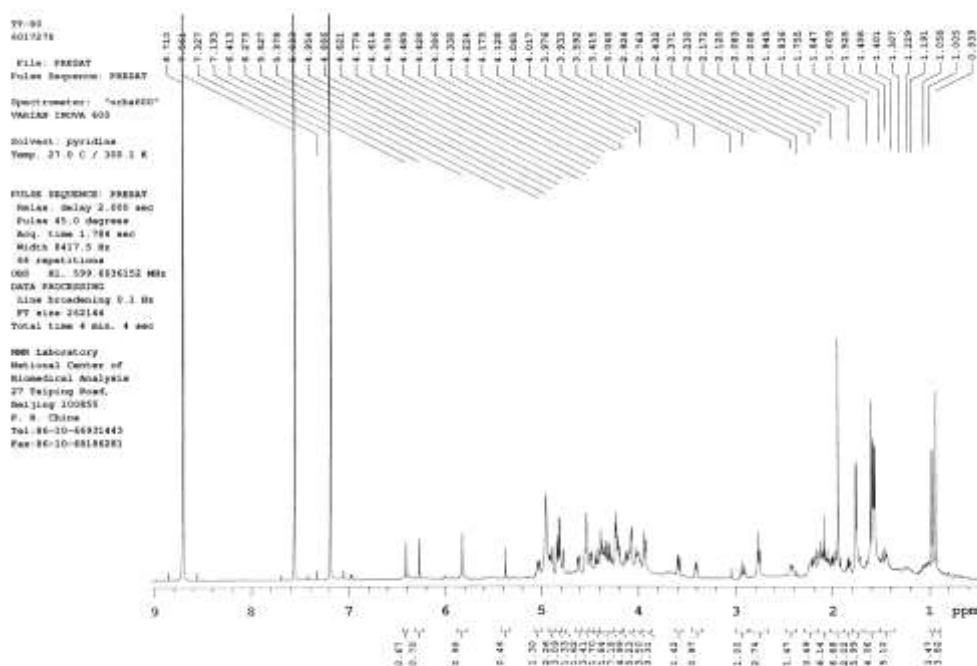

**Figure S1.** The  $^1\text{H}$  NMR spectrum of compound **1**.

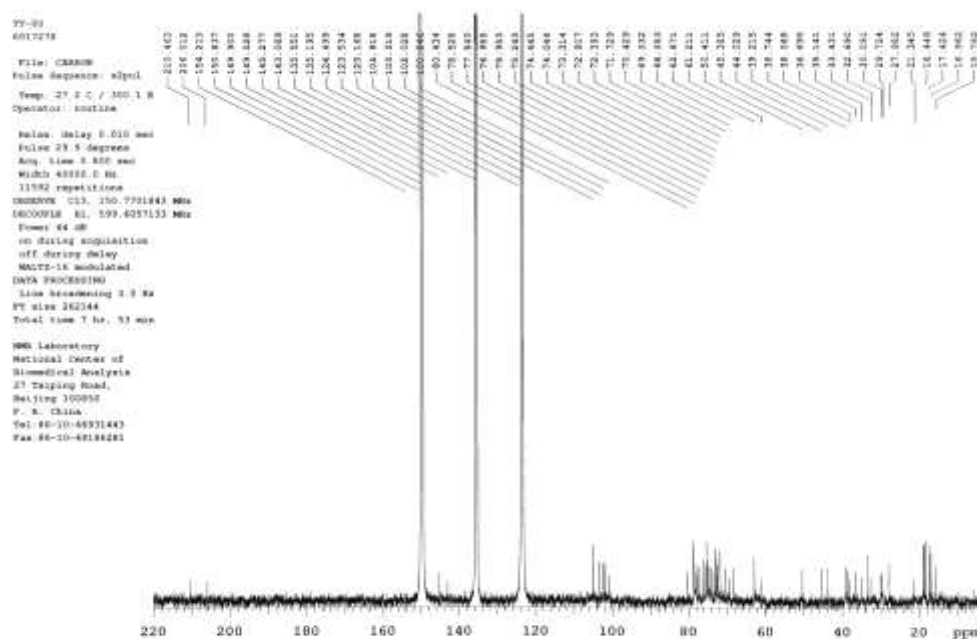

**Figure S2.** The  $^{13}\text{C}$  NMR spectrum of compound **1**.





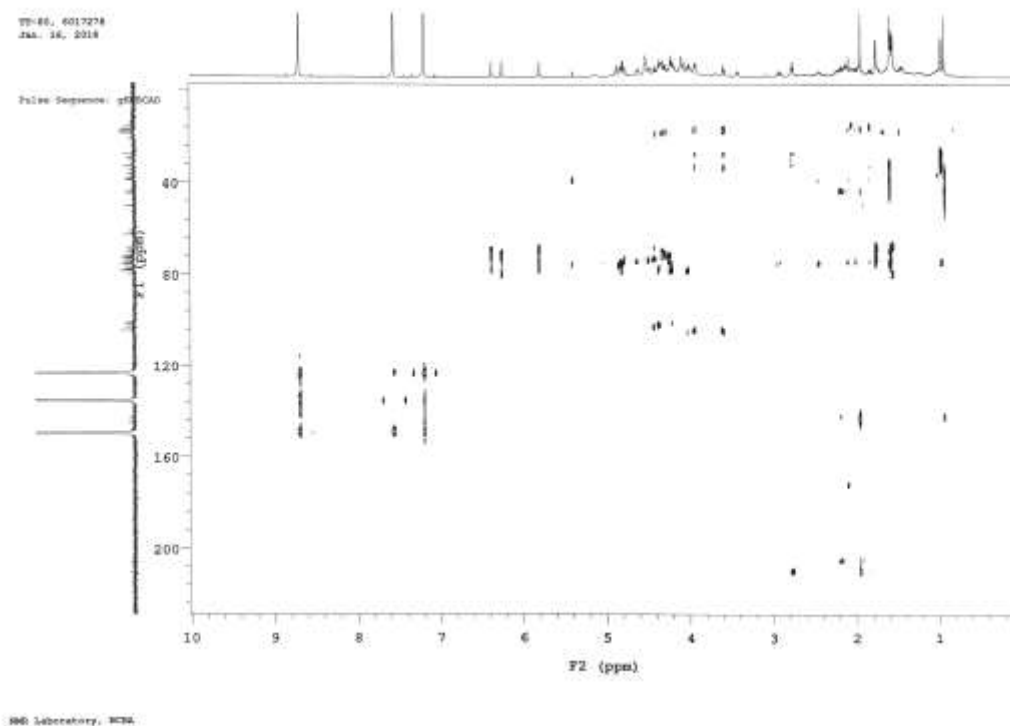

**Figure S5.** The HMBC spectrum of compound **1**.

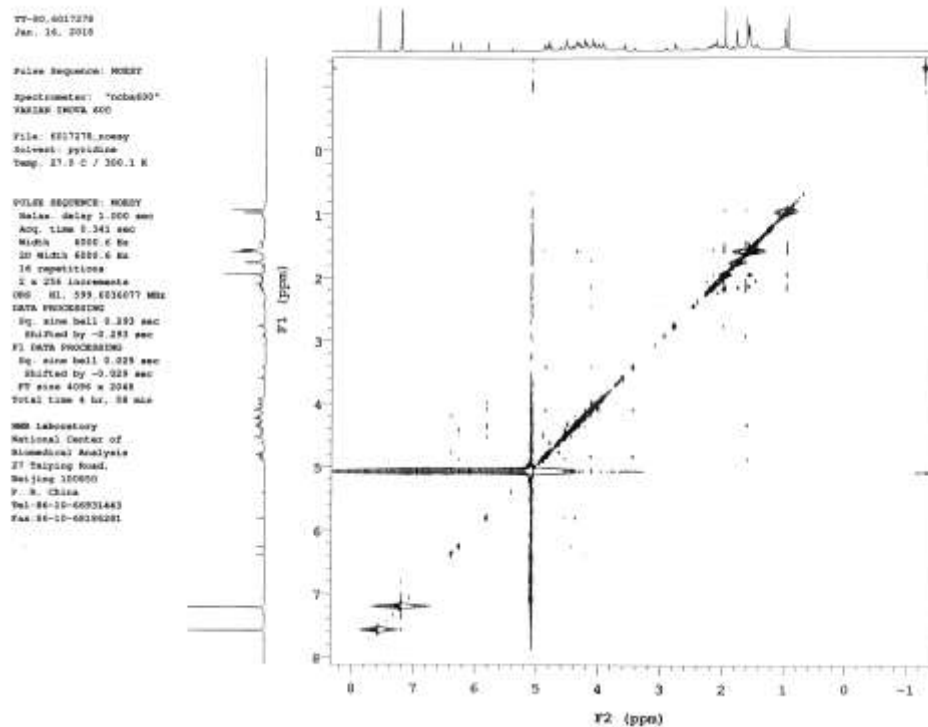

**Figure S6.** The NOESY of compound **1**.



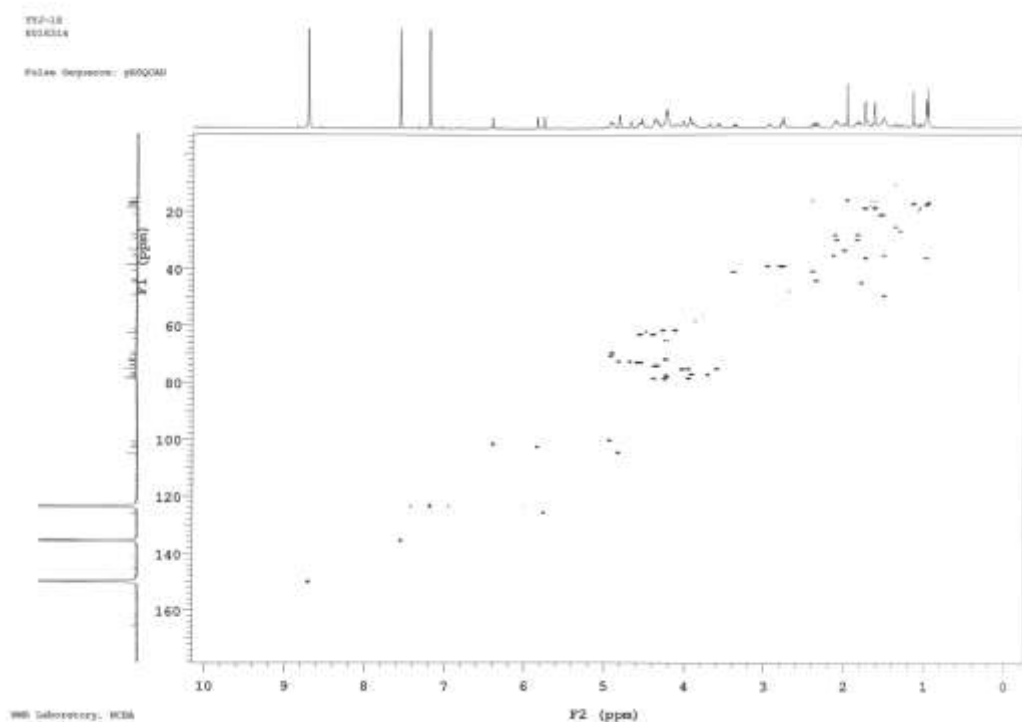

**Figure S9.** The HSQC spectrum of compound **2**.

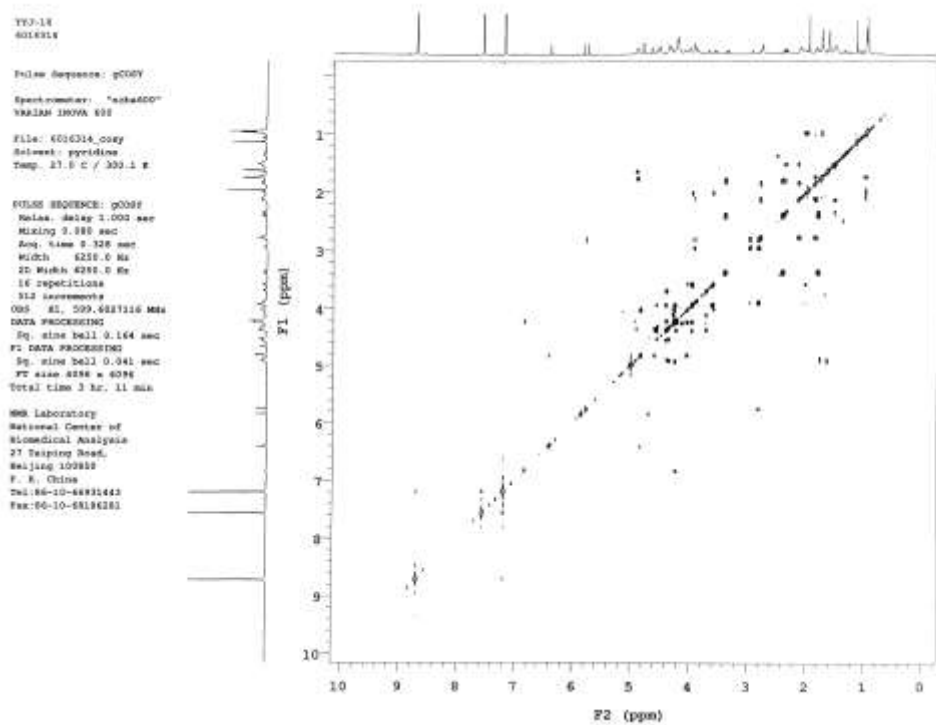

**Figure S10.** The  $^1\text{H}$ - $^1\text{H}$  COSY of compound **2**.



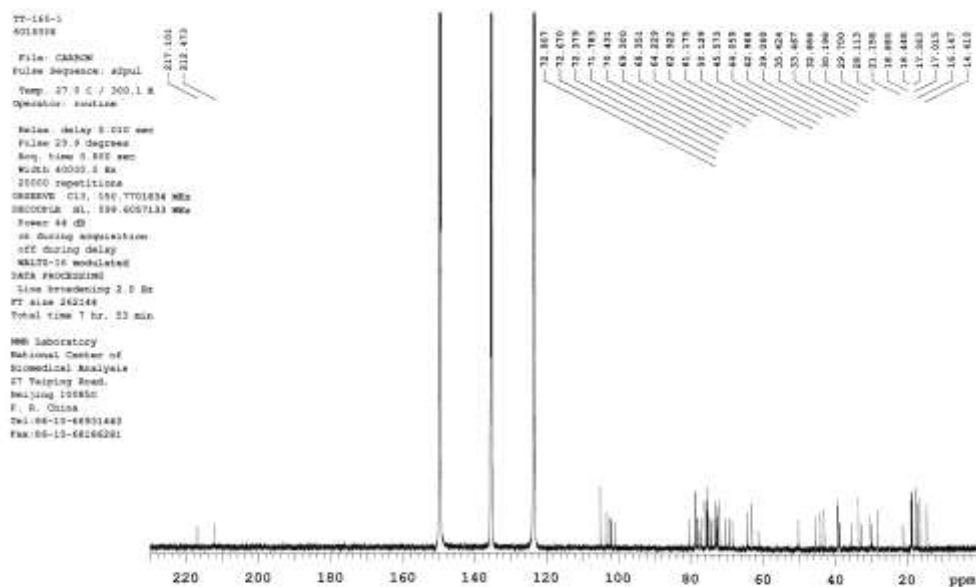

**Figure S13.** The  $^{13}\text{C}$  NMR spectrum of compound **3**.

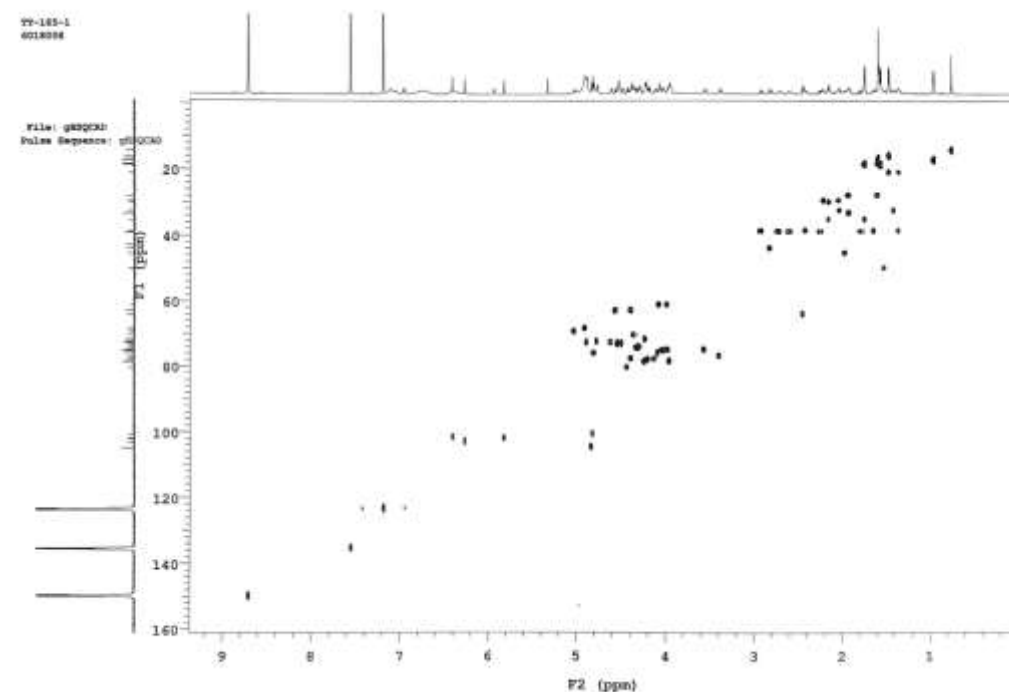

**Figure S14.** The HSQC spectrum of compound **3**.

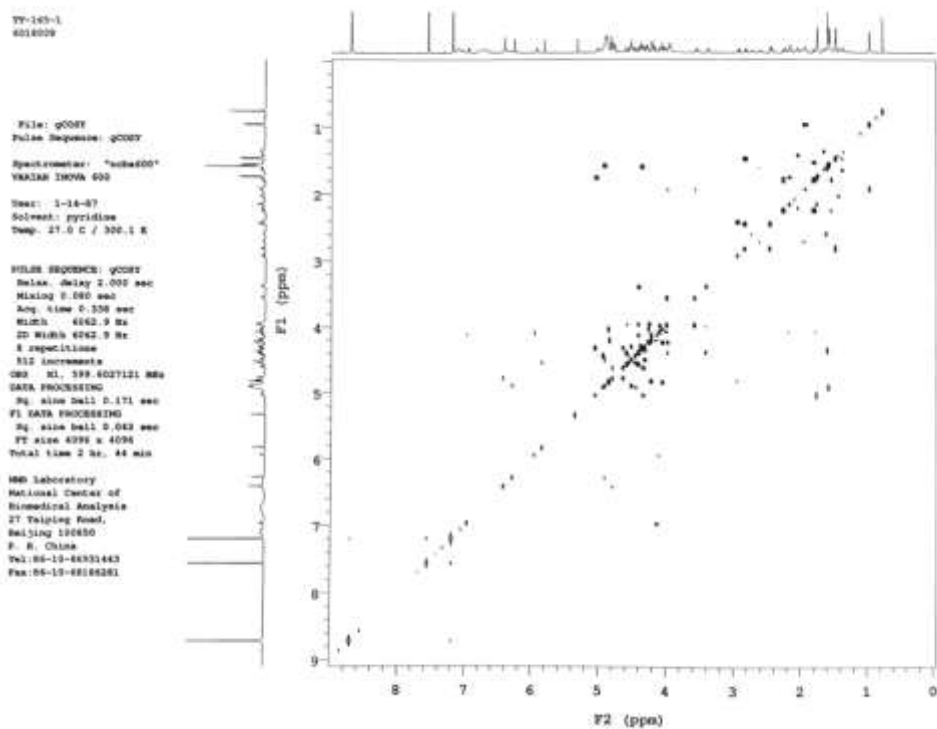

**Figure S15.** The  $^1\text{H}$ - $^1\text{H}$  COSY of compound **3**.

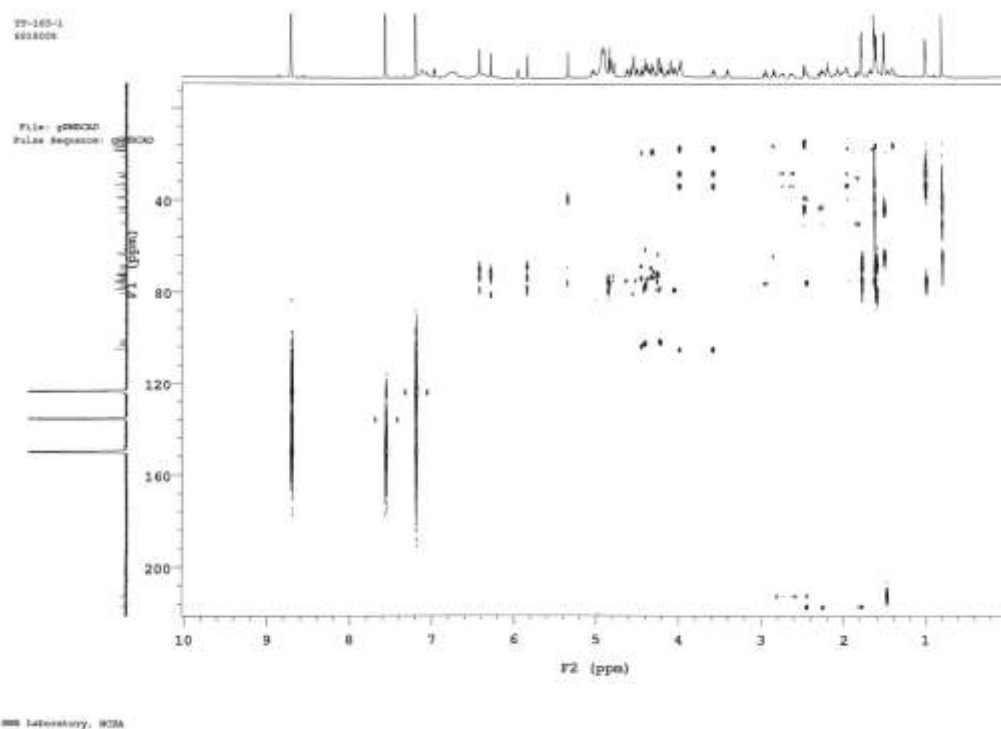

**Figure S16.** The HMBC spectrum of compound **3**.





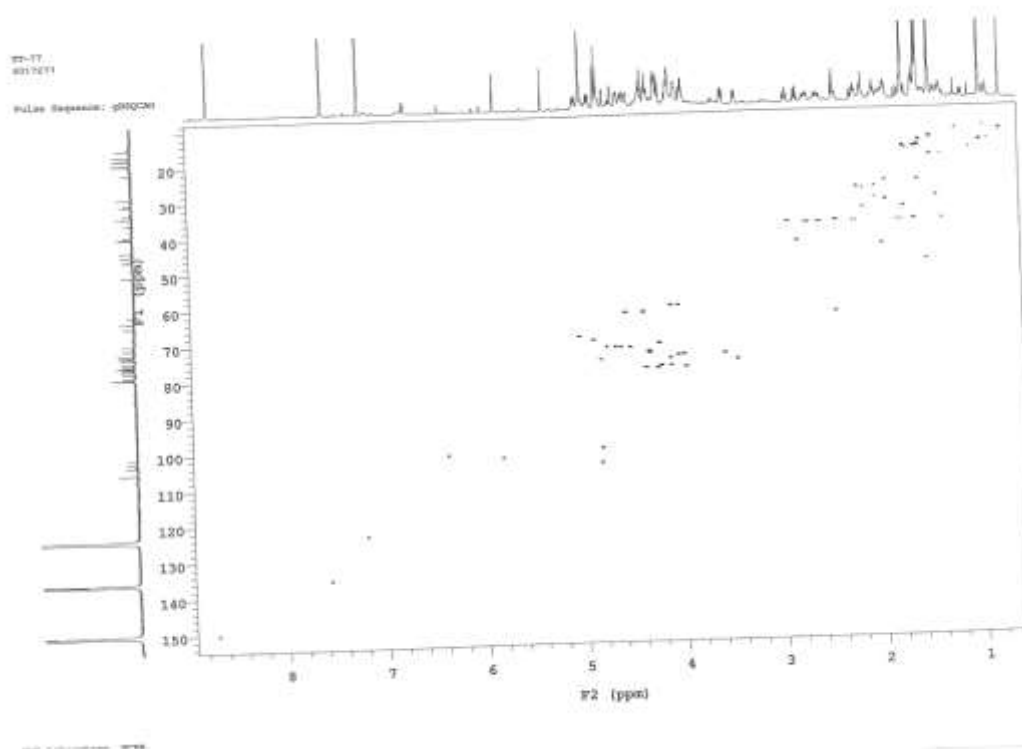

**Figure S19.** The HSQC spectrum of compound **4**.

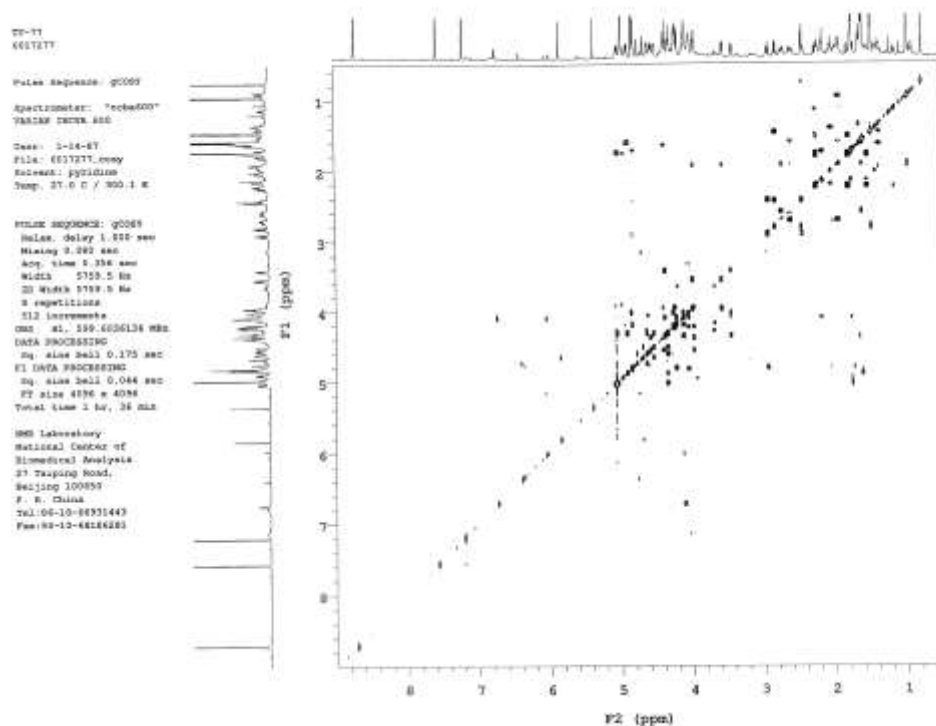

**Figure S20.** The  $^1\text{H}$ - $^1\text{H}$  COSY of compound **4**.



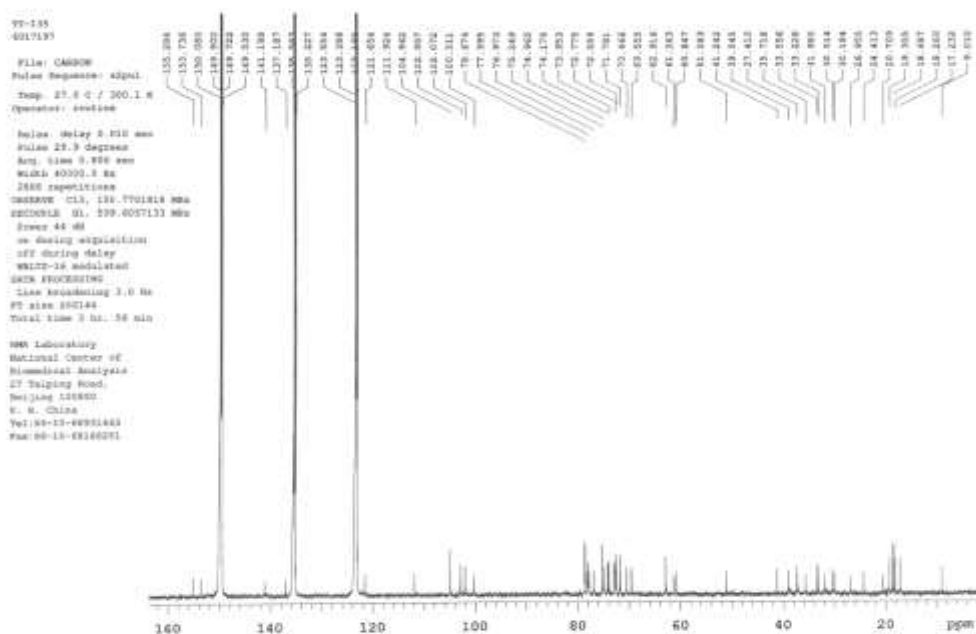

**Figure S23.** The  $^{13}\text{C}$  NMR spectrum of compound **5**.

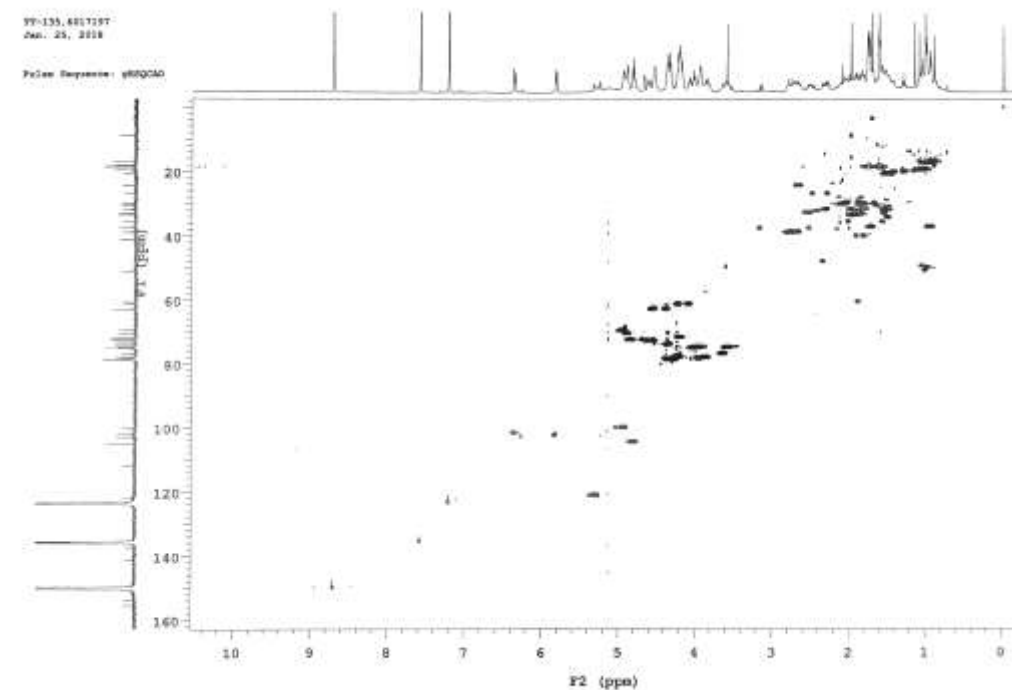

**Figure S24.** The HSQC spectrum of compound **5**.

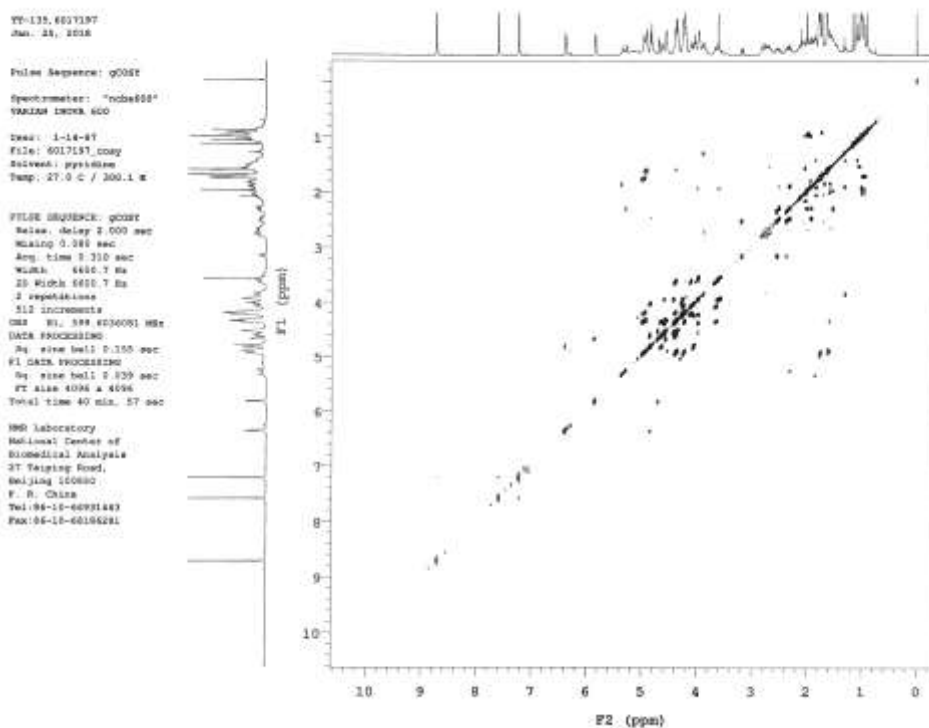

**Figure S25.** The  $^1\text{H}$ - $^1\text{H}$ -COSY of compound **5**.

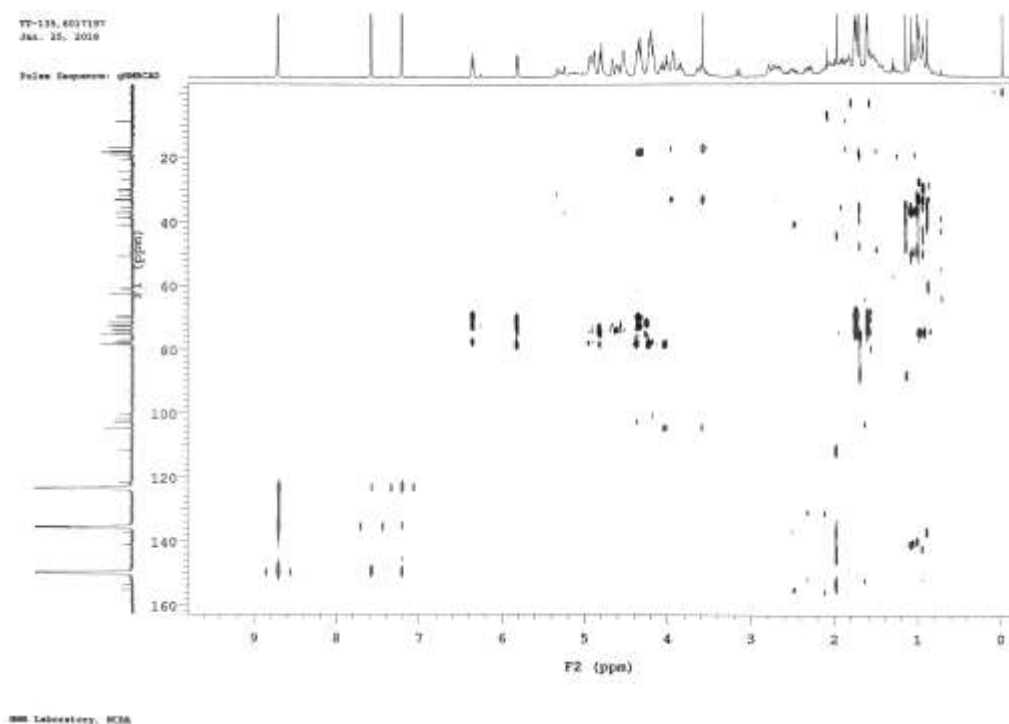

**Figure S26.** The HMBC spectrum of compound **5**.



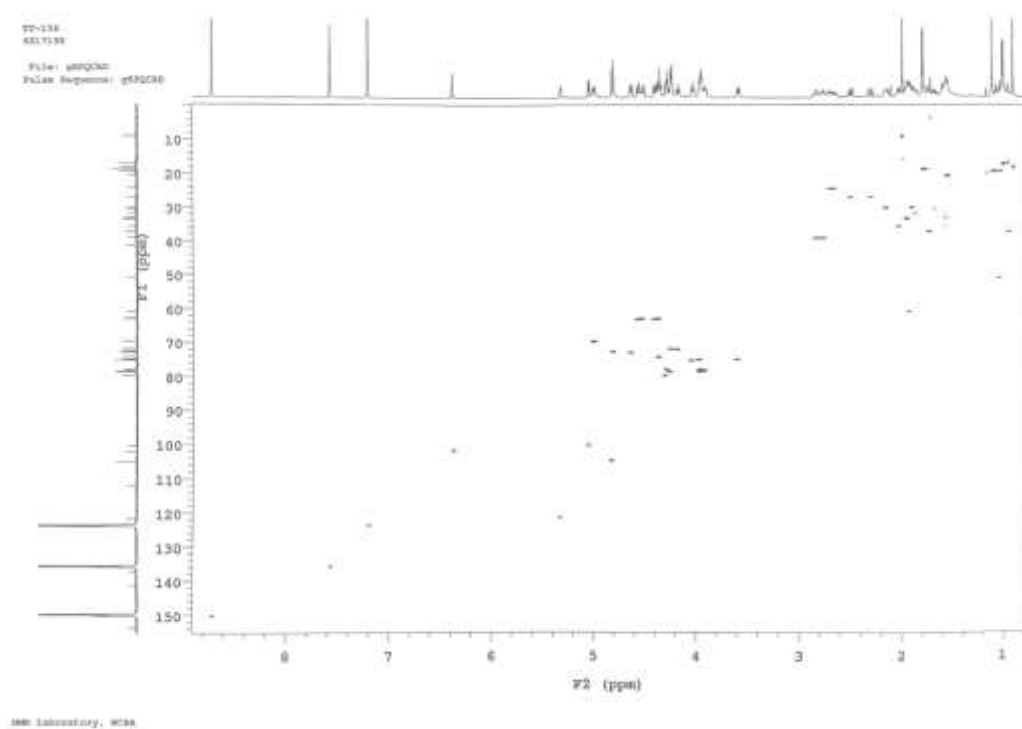

**Figure S29.** The HSQC spectrum of compound **6**.

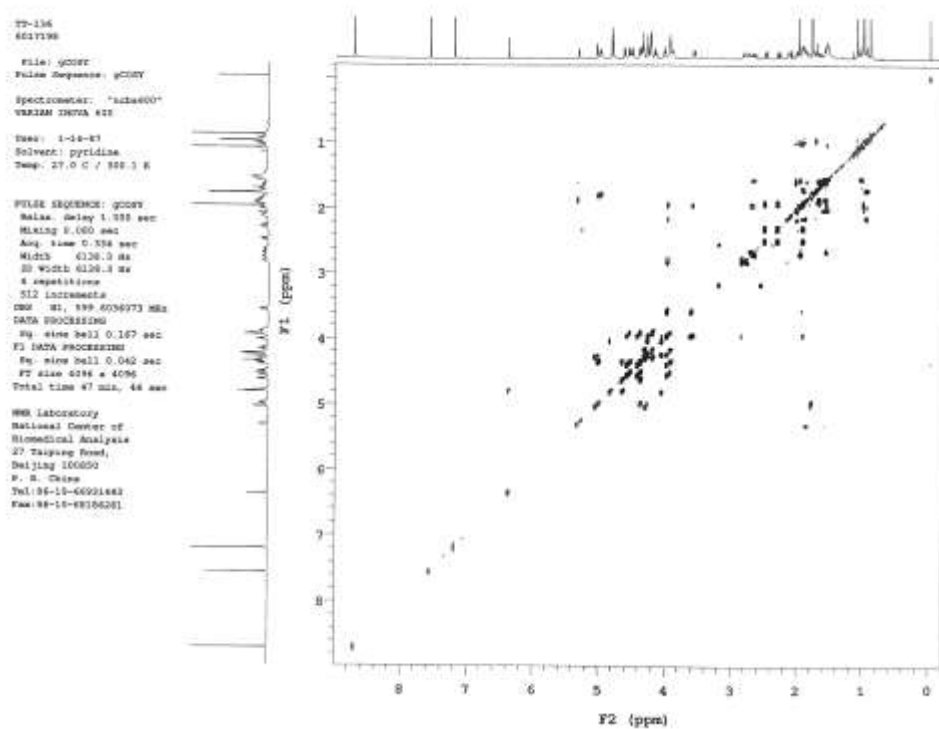

**Figure S30.** The  $^1\text{H}$ - $^1\text{H}$  COSY spectrum of compound **6**.

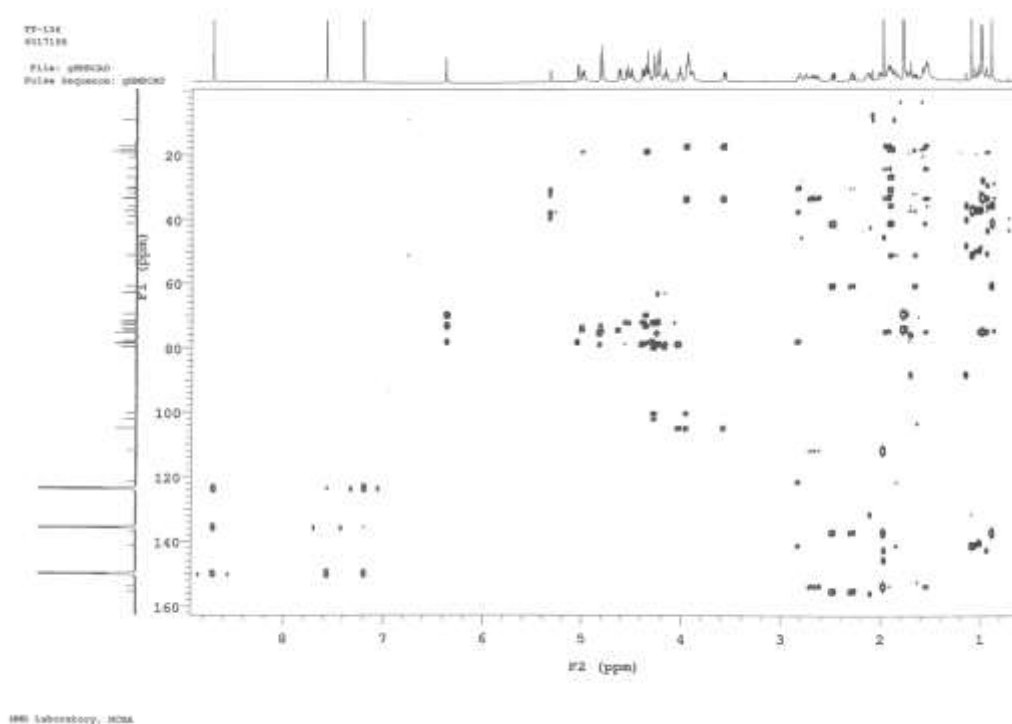

**Figure S31.** The HMBC spectrum of compound **6**.

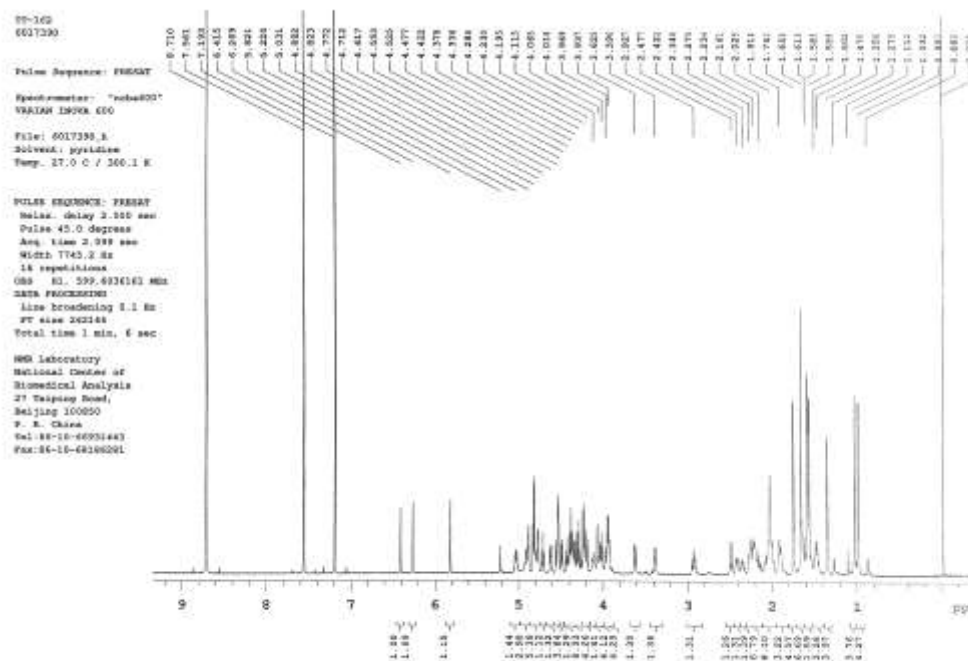

**Figure S32.** The  $^1\text{H}$  NMR spectrum of compound **7**.

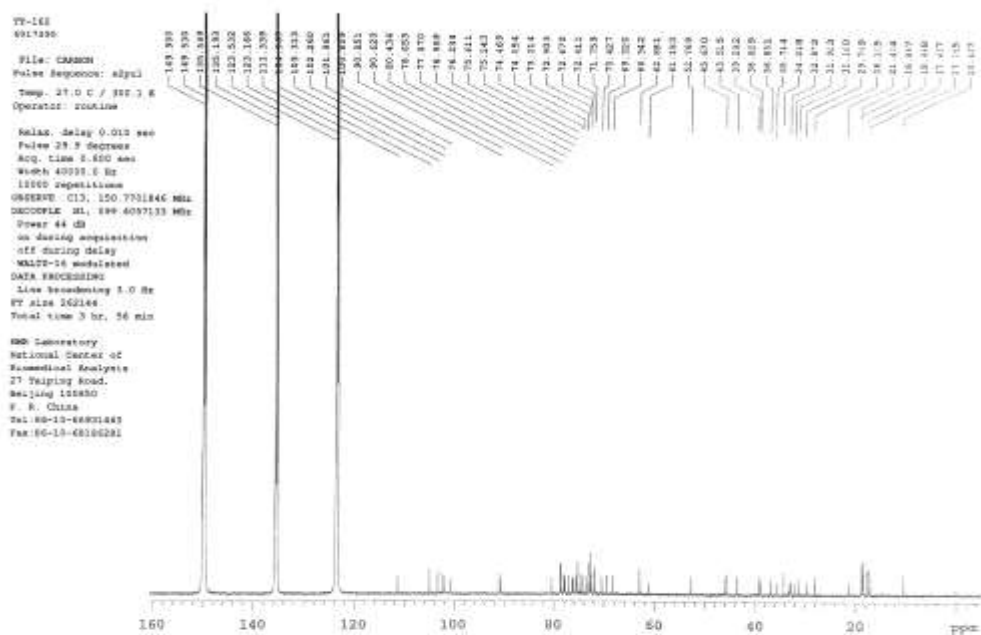

**Figure S33.** The  $^{13}\text{C}$  NMR spectrum of compound **7**.

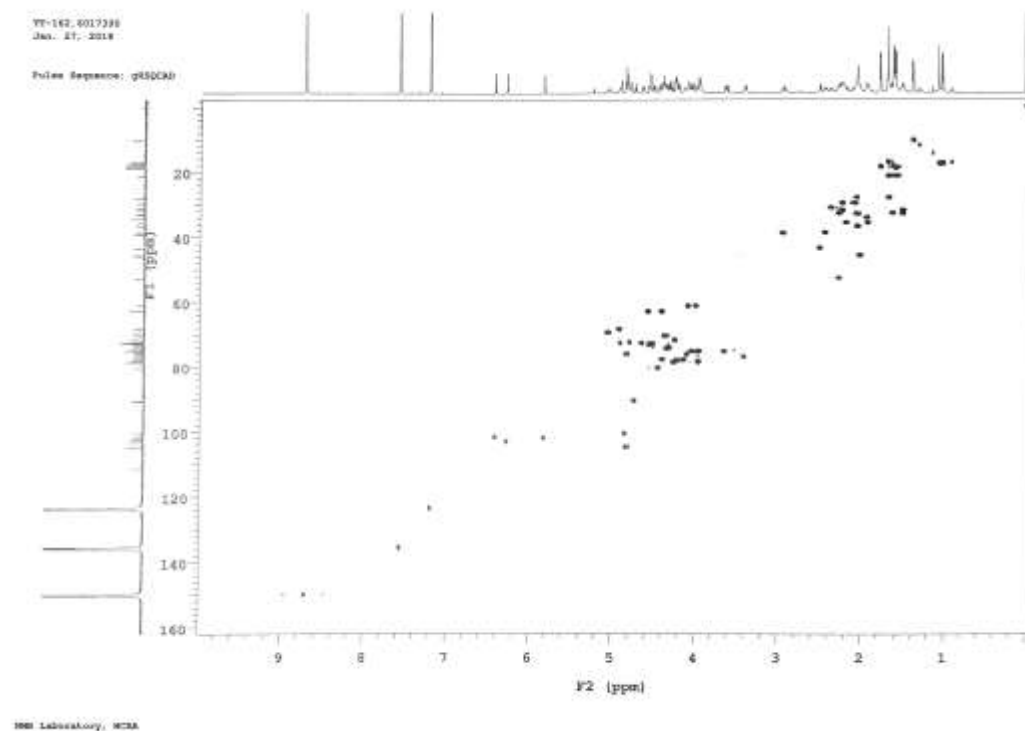

**Figure S34.** The HSQC spectrum of compound **7**.



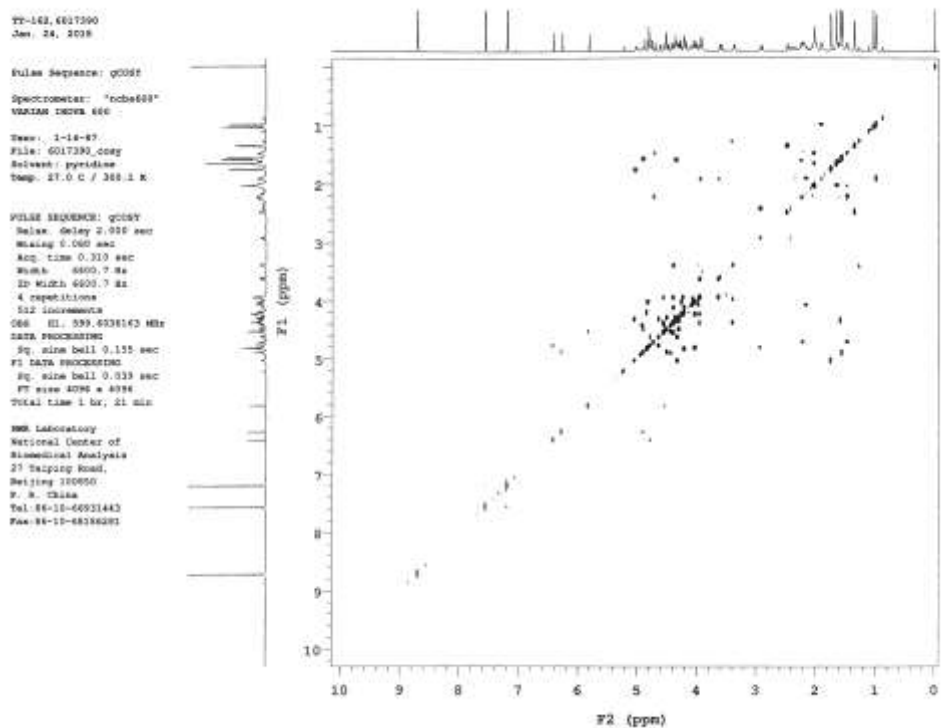

**Figure S35.** The  $^1\text{H}$ - $^1\text{H}$  COSY spectrum of compound **7**.

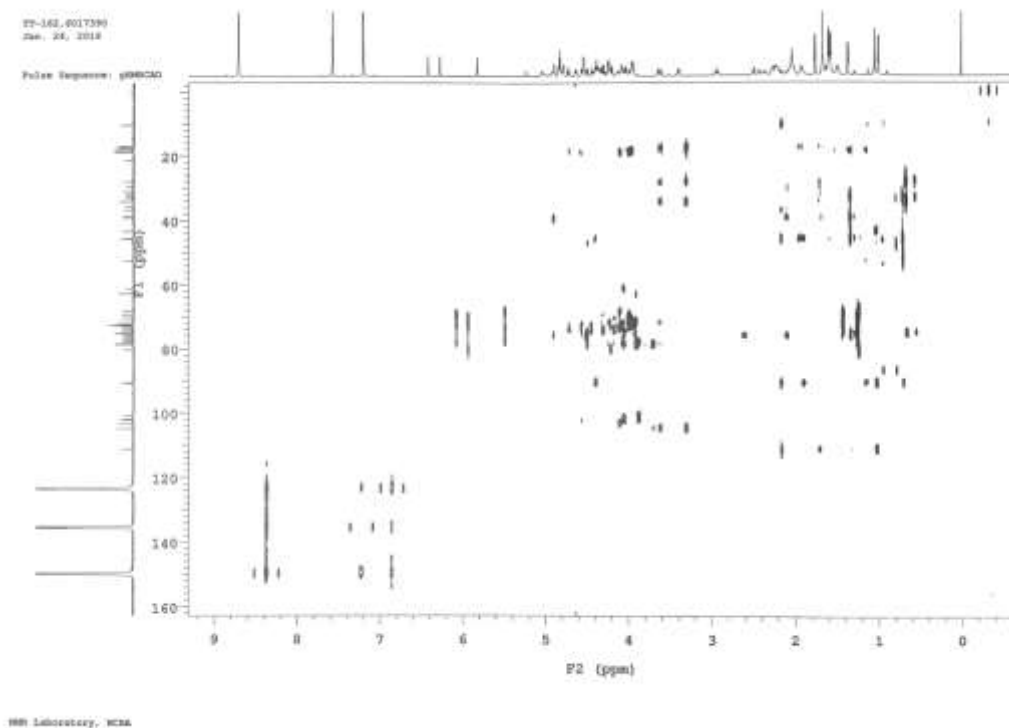

**Figure S36.** The HMBC spectrum of compound **7**.

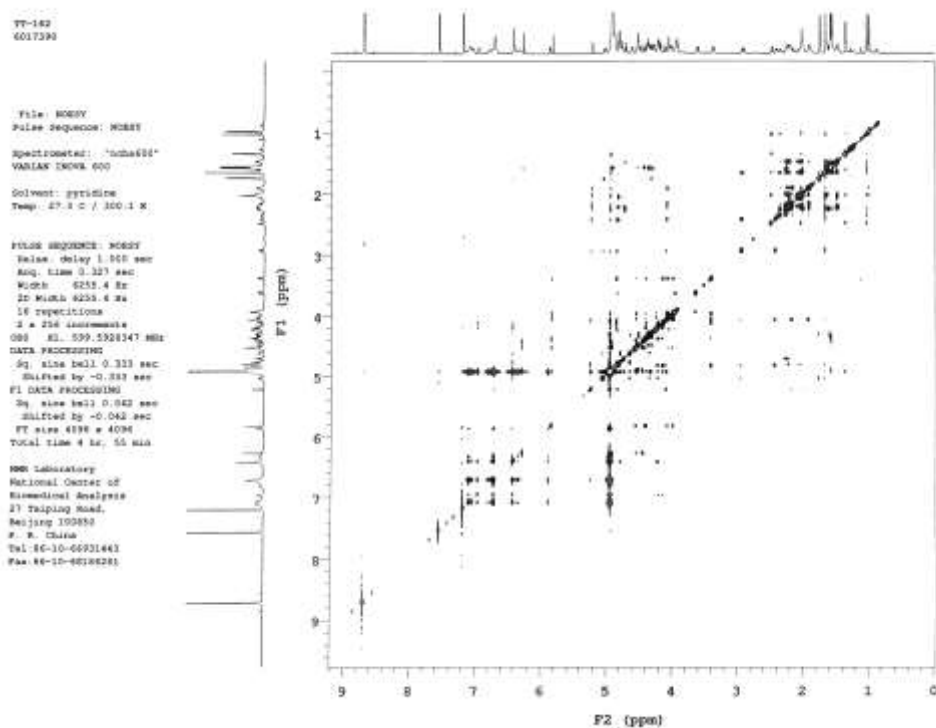

**Figure S37.** The NOESY of compound **7**.

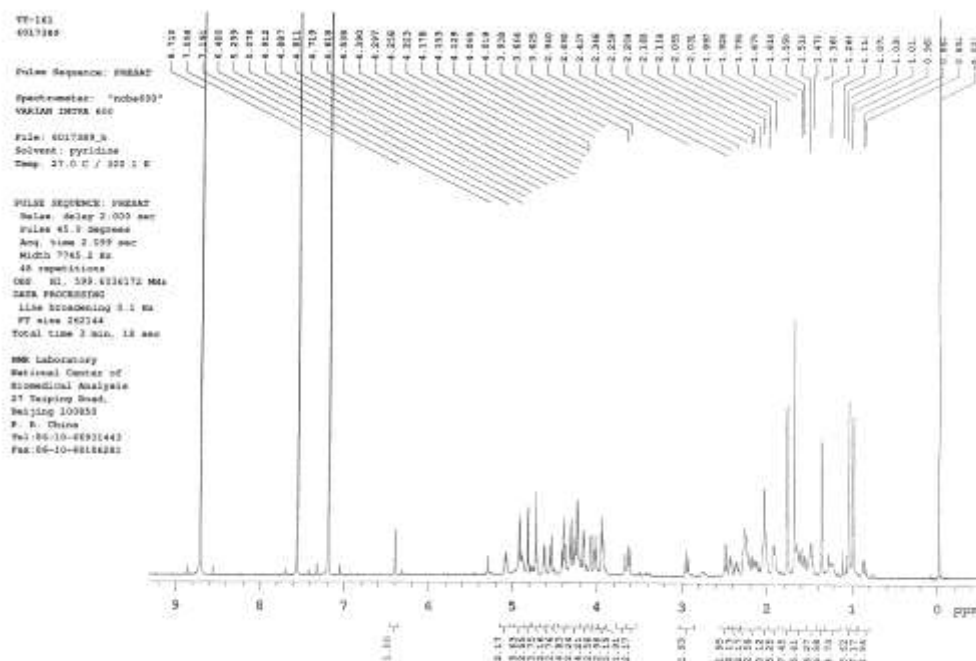

**Figure S38.** The  $^1\text{H}$  NMR spectrum of compound **8**.

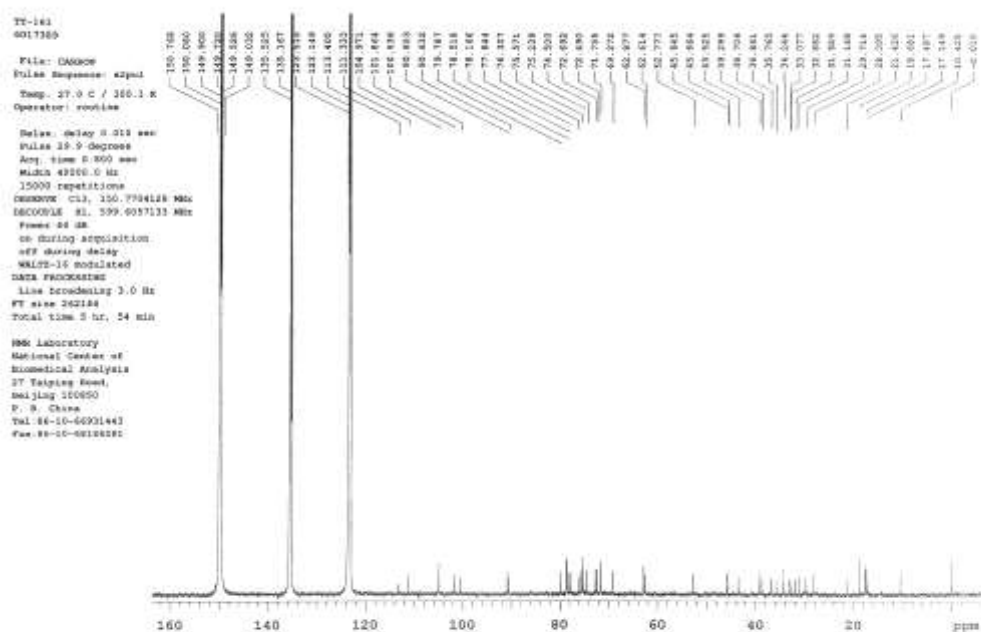

**Figure S39.** The  $^{13}\text{C}$  NMR spectrum of compound **8**.

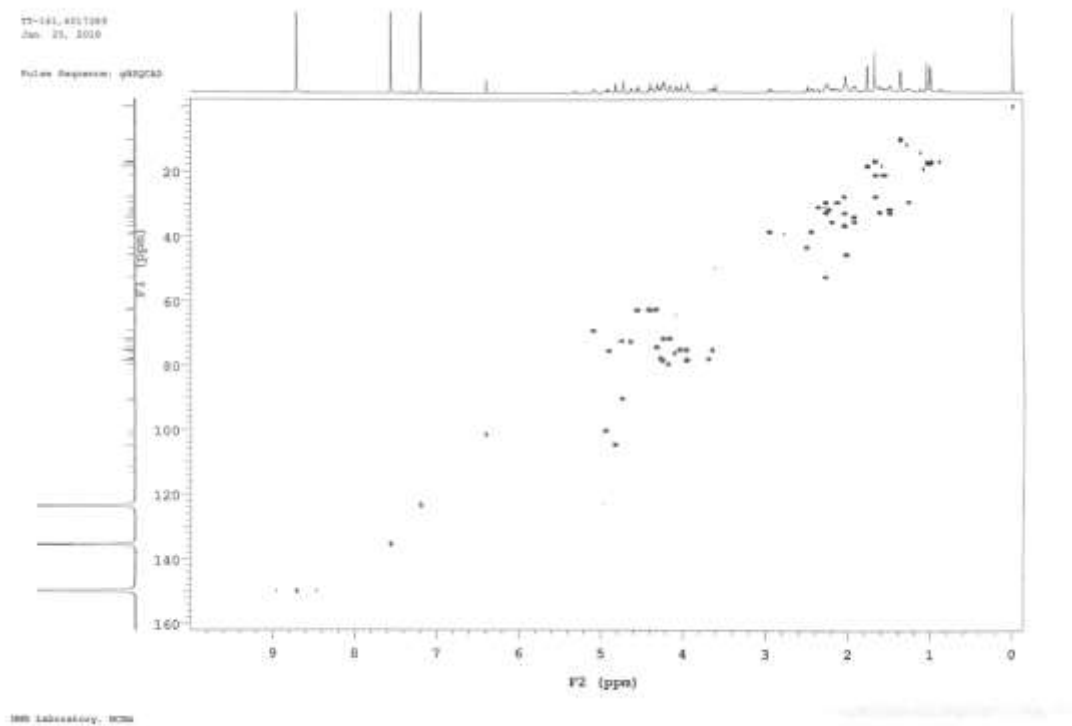

**Figure S40.** The HSQC spectrum of compound **8**.

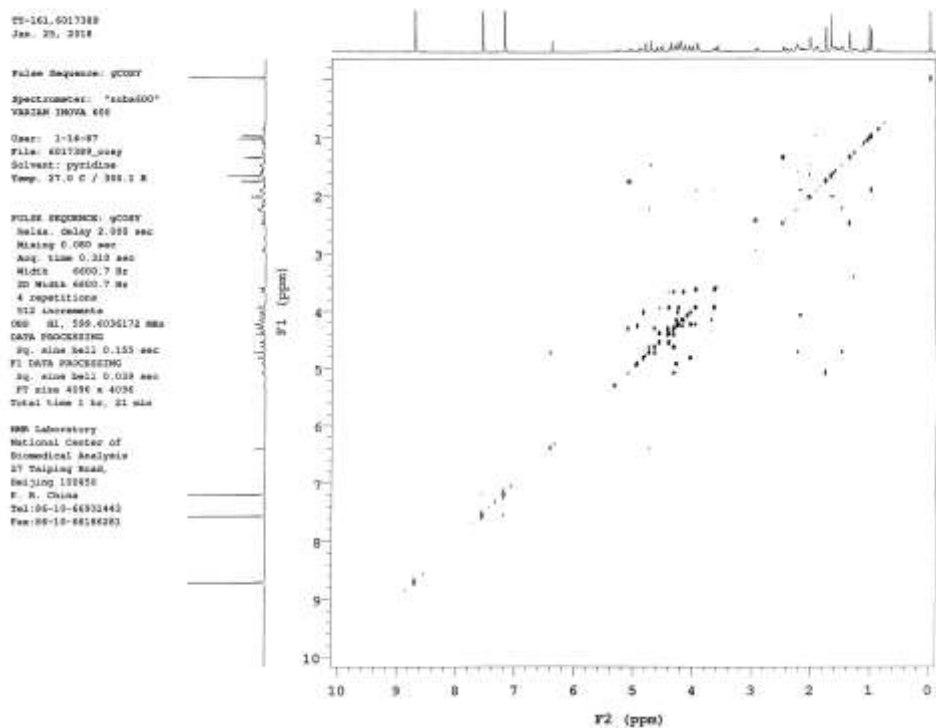

**Figure S41.** The  $^1\text{H}$ - $^1\text{H}$  COSY spectrum of compound **8**.

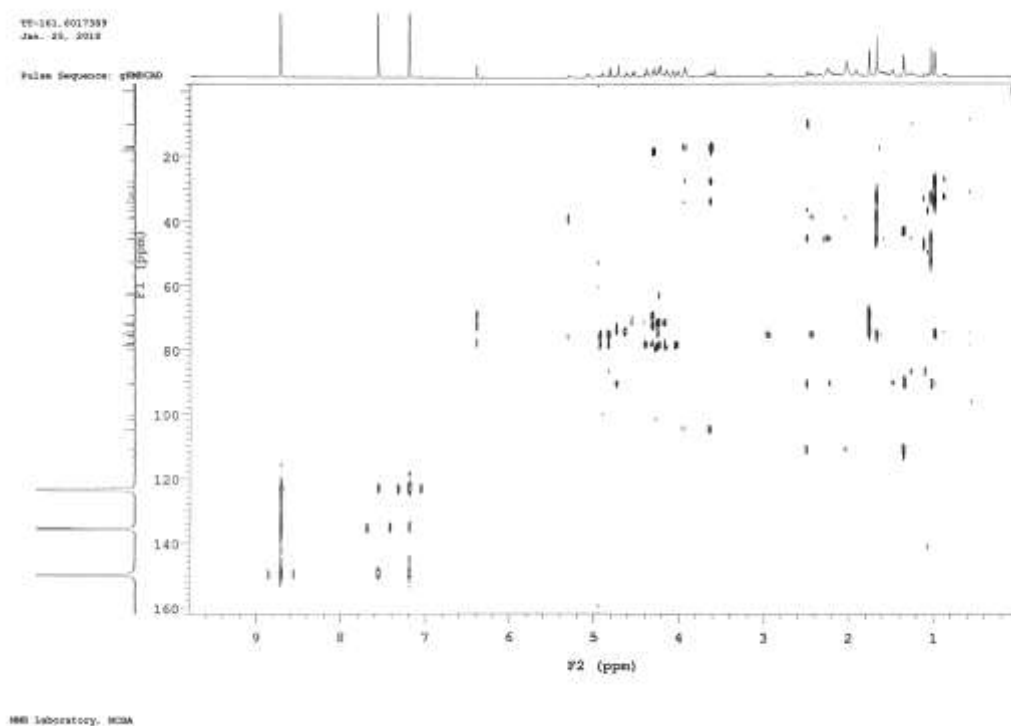

**Figure S42.** The HMBC spectrum of compound **8**.



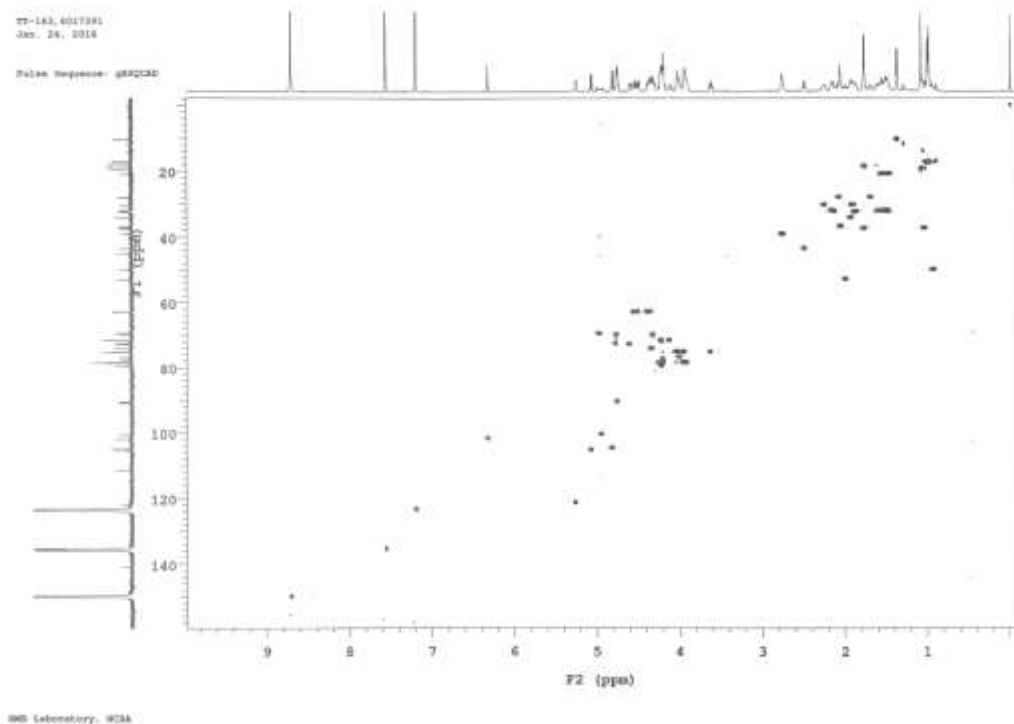

**Figure S45.** The HSQC spectrum of compound **9**.

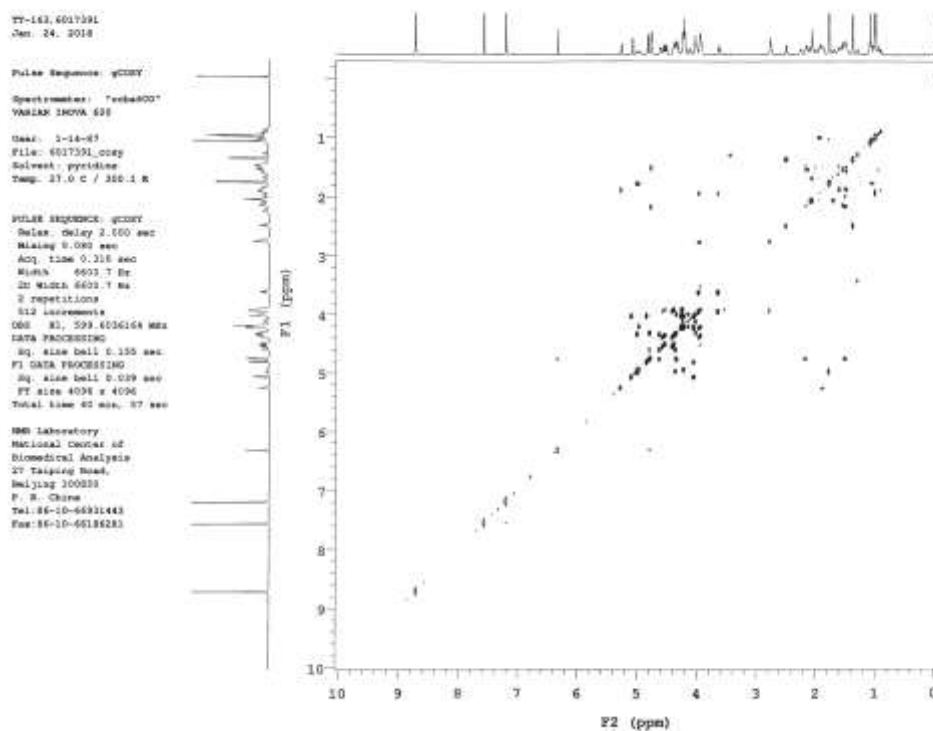

**Figure S46.** The  $^1\text{H}$ - $^1\text{H}$  COSY spectrum of compound **9**.

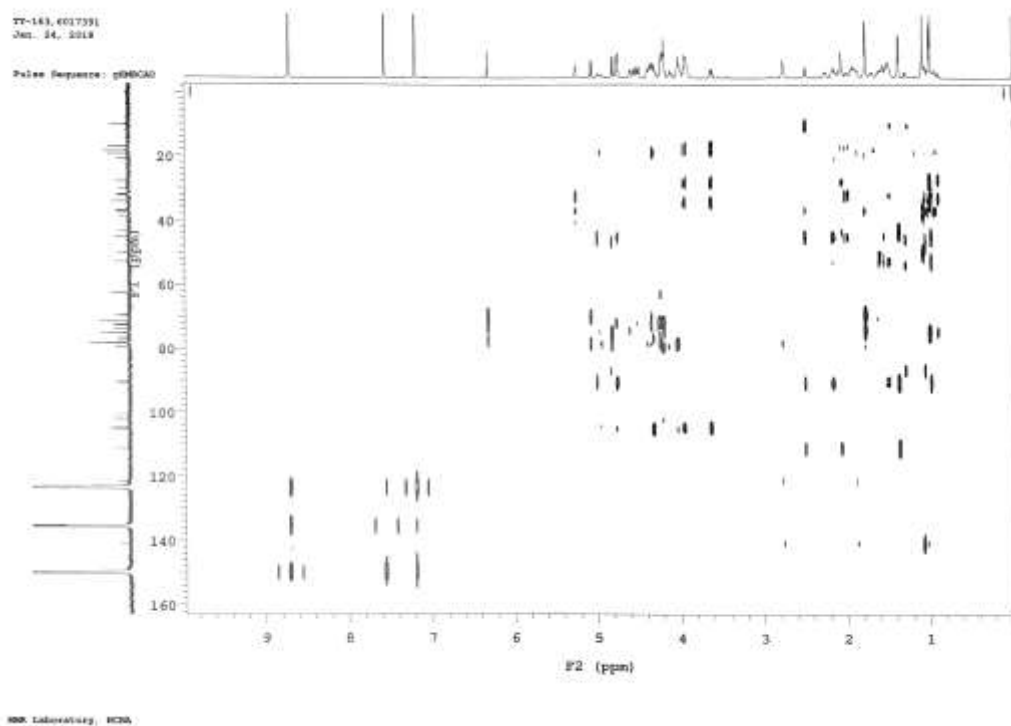

**Figure S47.** The HMBC spectrum of compound **9**.

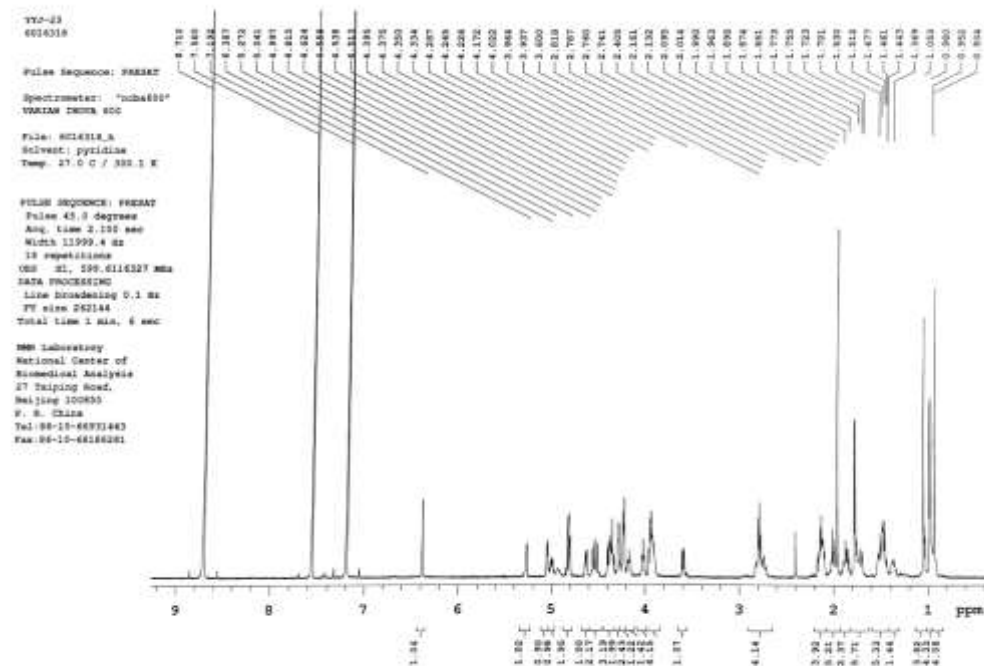

**Figure S48.** The  $^1\text{H}$  NMR spectrum of compound **10**.





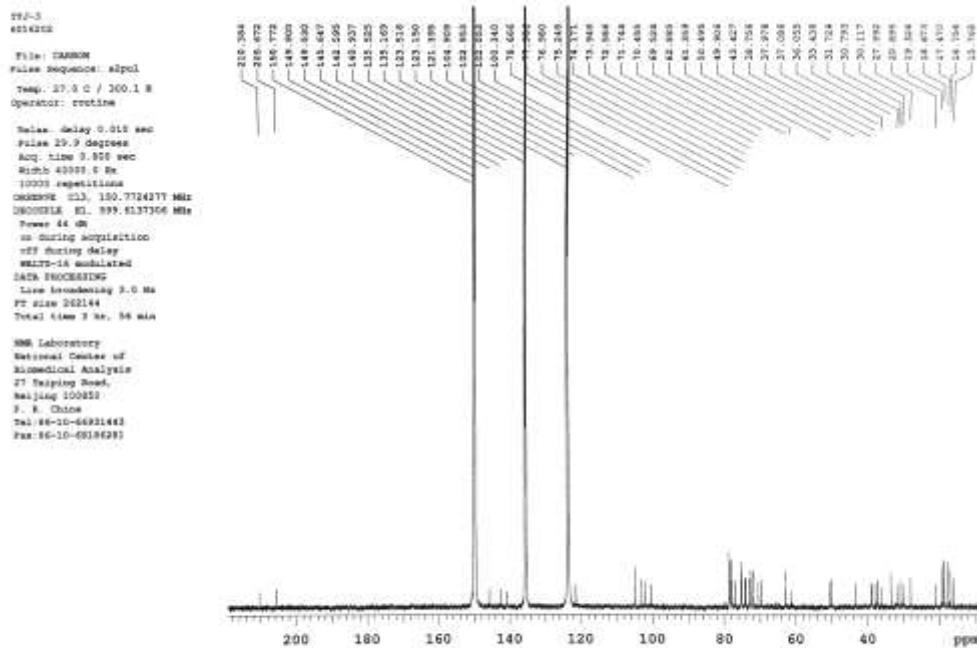

Figure S51. The  $^{13}\text{C}$  NMR spectrum of compound **11**.

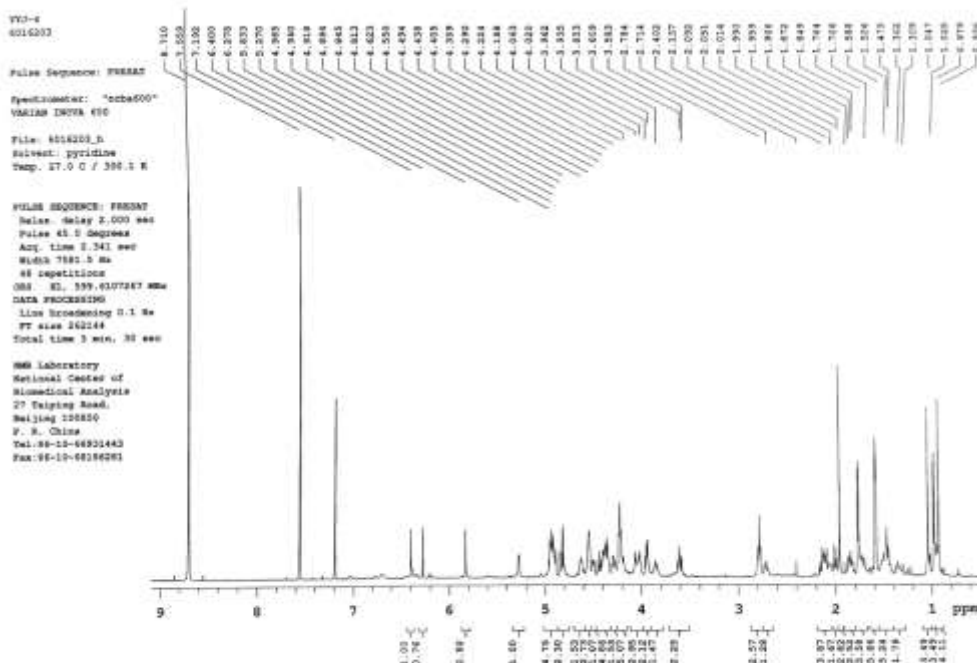

Figure S52. The  $^1\text{H}$  NMR spectrum of compound **12**.



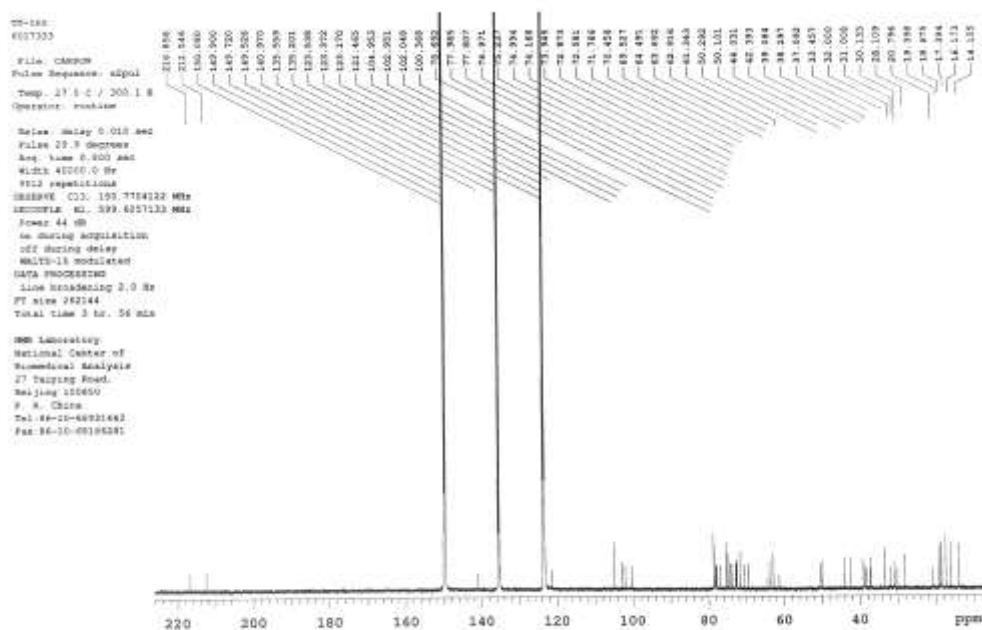

Figure S55. The  $^{13}\text{C}$  NMR spectrum of compound **13**.

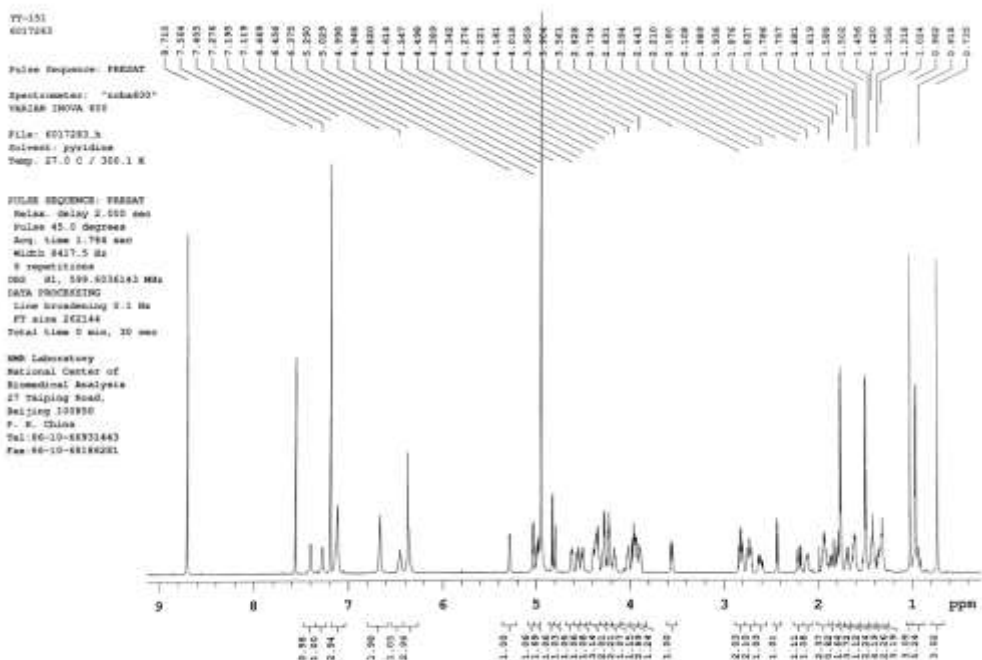

Figure S56. The  $^1\text{H}$  NMR spectrum of compound **14**.





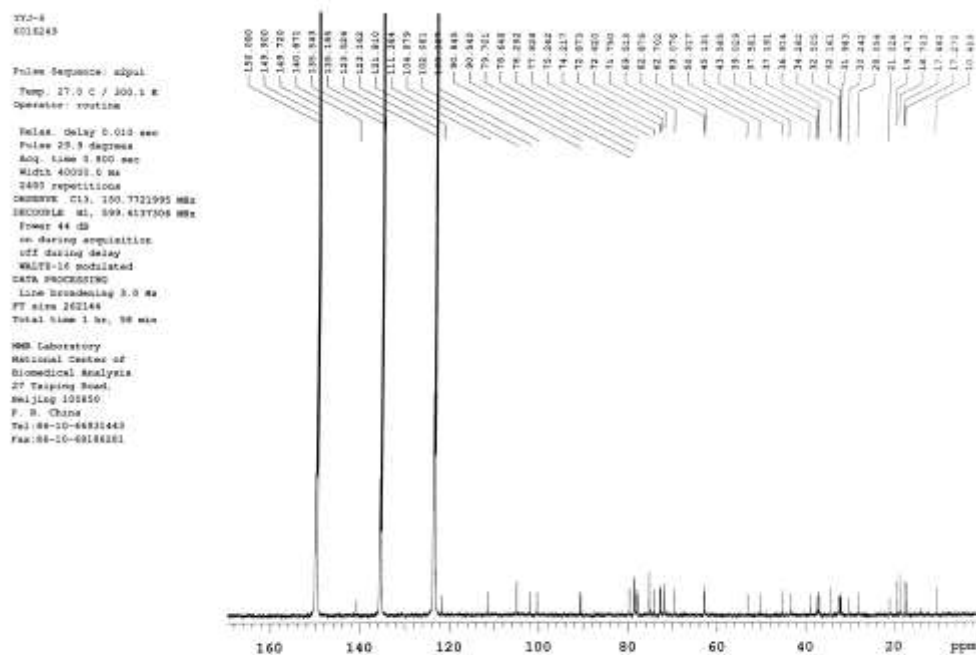

Figure S61. The  $^{13}\text{C}$  NMR spectrum of compound **16**.

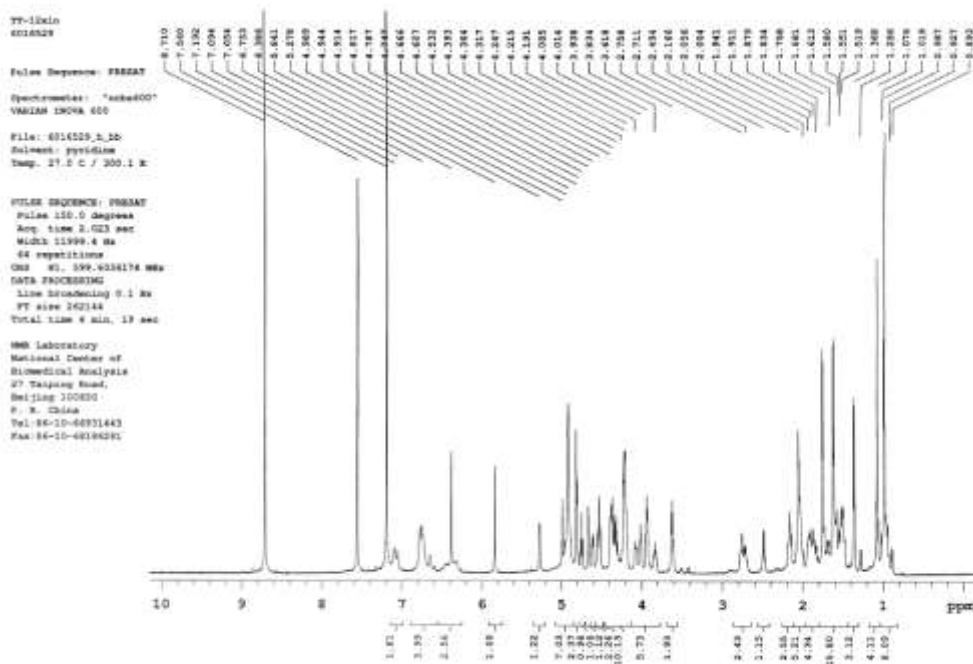

Figure S62. The  $^1\text{H}$  NMR spectrum of compound **17**.

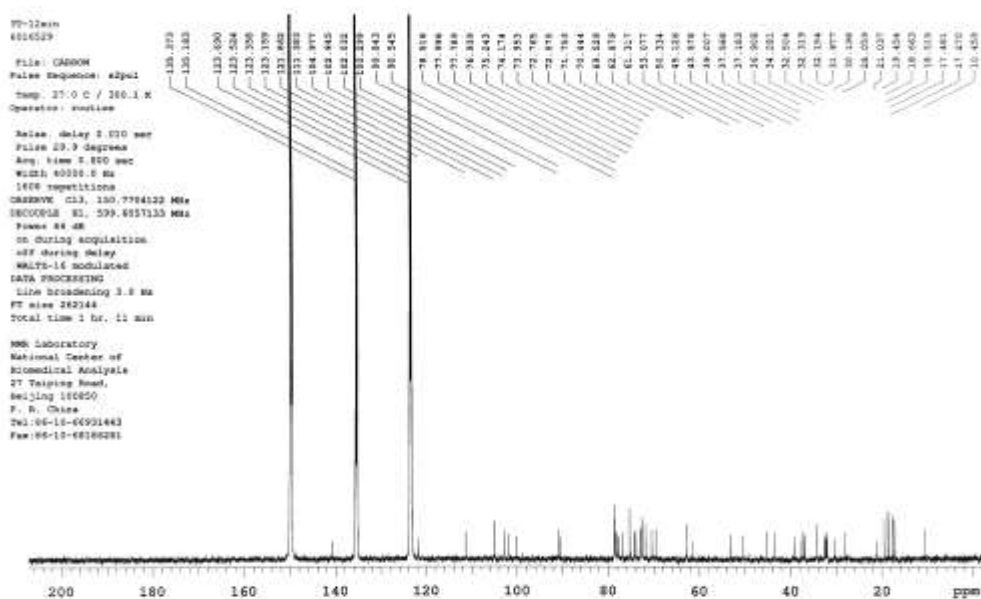

Figure S63. The  $^{13}\text{C}$  NMR spectrum of compound 17.

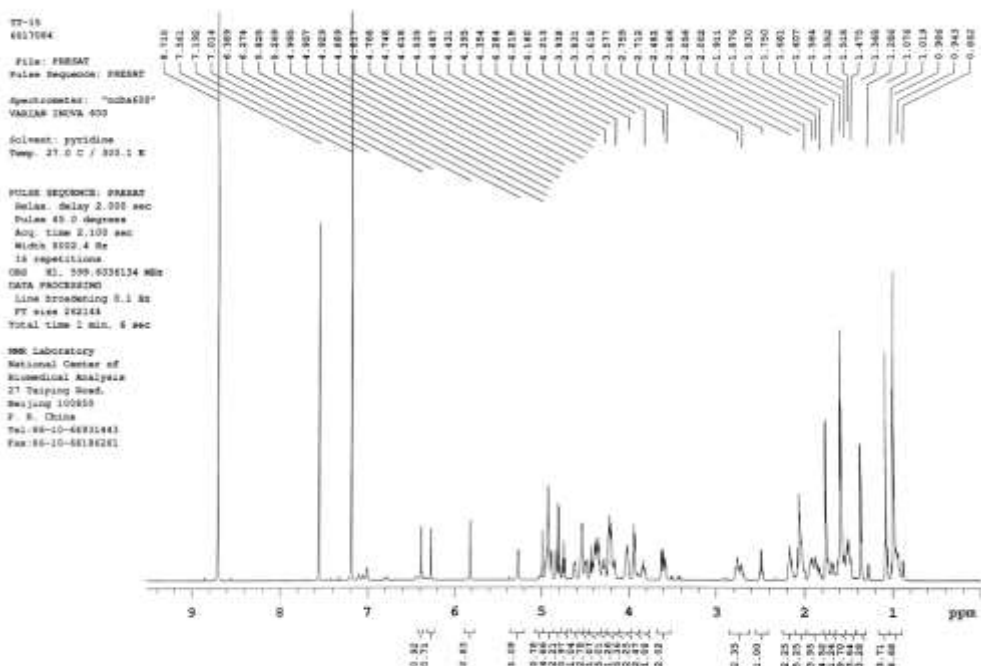

Figure S64. The  $^1\text{H}$  NMR spectrum of compound 18.

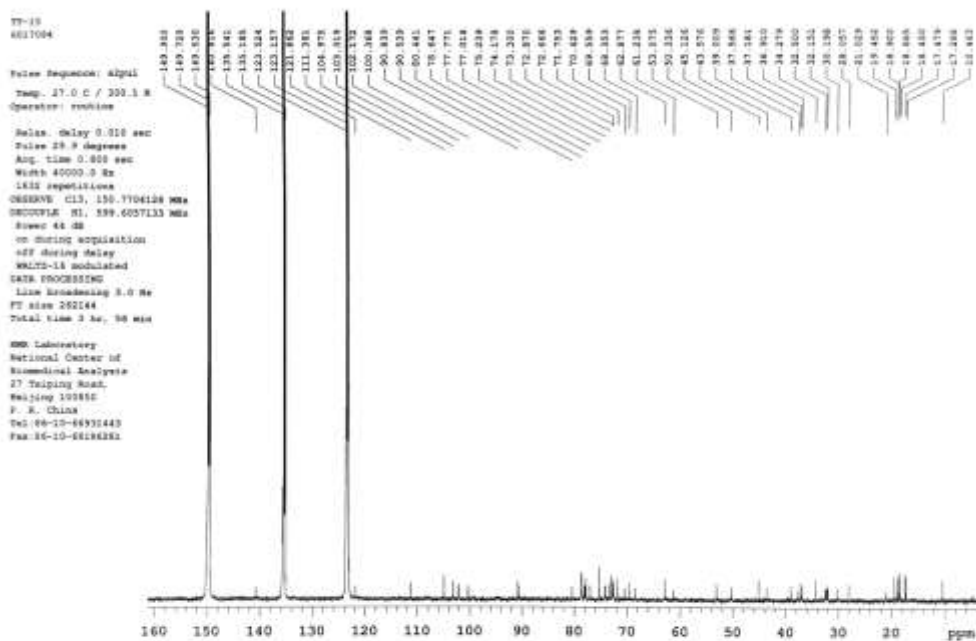

Figure S65. The  $^{13}\text{C}$  NMR spectrum of compound **18**.

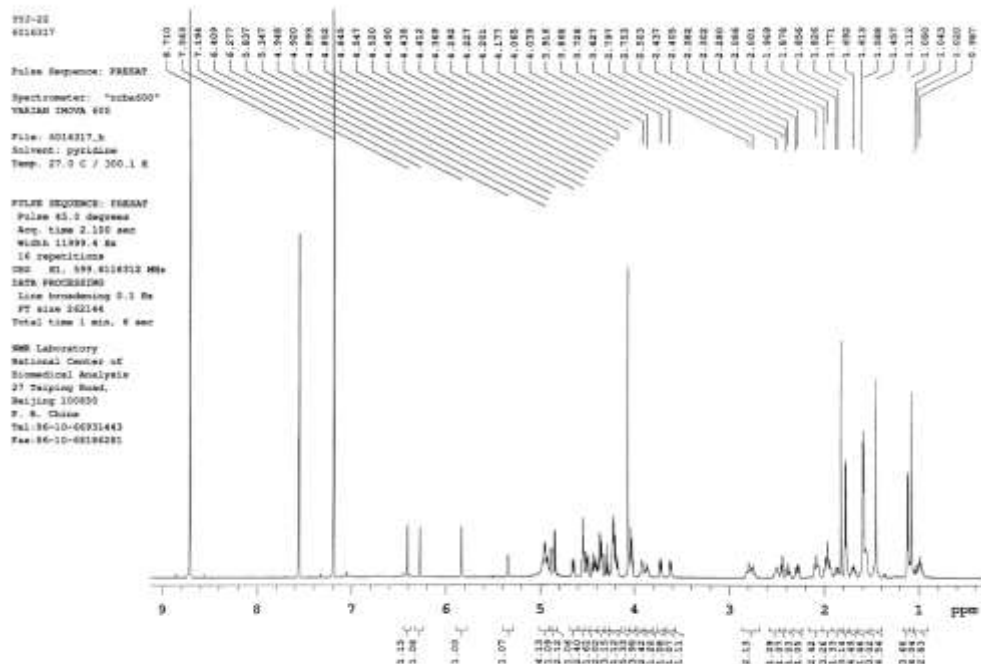

Figure S66. The  $^1\text{H}$  NMR spectrum of compound **19**.





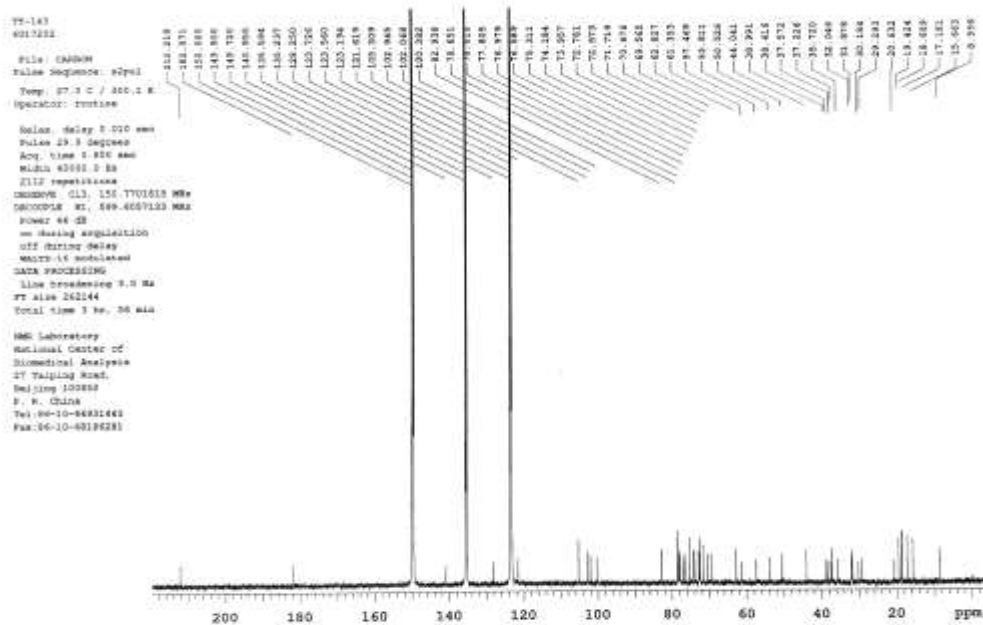

**Figure S69.** The  $^{13}\text{C}$  NMR spectrum of compound **20**.
